# Supplementary material
Source: HighWire-hosted journal article supplement (https://gut.bmj.com/content/69/1/52)
Supplement: inline-supplementary-material-1 [file inline-supplementary-material-1.pdf]

Supplementary Table 1. Detailed clinical, laboratory, pathologic, molecular and follow-up characteristics of 252 patients (training and validation sets) prospectively submitted for BiliSeq analysis.

| Set        | Patient | Gender | Age (years) | History of PSC | Serum CA19-9 (Units/mL) | Location of Stricture | Malignant Bile Duct Pathology Brushing/Biopsy** | Specimen for BiliSeq Testing | Molecular Alterations                                                                     | Follow-up Diagnosis              | Method of Follow-up Diagnosis                                      | Status, Months of Follow-up |
|------------|---------|--------|-------------|----------------|-------------------------|-----------------------|-------------------------------------------------|------------------------------|-------------------------------------------------------------------------------------------|----------------------------------|--------------------------------------------------------------------|-----------------------------|
| Training   | 1       | F      | 82          | No             | 1777.3                  | Hilar                 | N/S / Negative (CG)                             | Biopsy (CG)                  | <i>KRAS p.G12D, CTNNB1 p.S45Y</i>                                                         | Perihilar Cholangiocarcinoma     | Liver EUS-FNA                                                      | Decreased, 4                |
| Training   | 2       | F      | 79          | No             | 25                      | Distal                | N/S / Positive (CG)                             | Biopsy (CG)                  | <i>KRAS p.Q61H, ATM p.K1706N</i>                                                          | Distal Cholangiocarcinoma        | Clinicoradiographic Impression                                     | Decreased, 12               |
| Training   | 3       | F      | 68          | No             | 0.8                     | Distal                | Negative / N/S                                  | Brushings                    | <i>Negative</i>                                                                           | Cholangiopathy                   | Whipple Resection                                                  | Alive, 33                   |
| Training   | 4       | M      | 76          | No             | 635                     | Intrahepatic          | N/S / Positive (CG)                             | Biopsy (CG)                  | <i>IDH1 p.R132C, BRAF p.G469V</i>                                                         | Intrahepatic Cholangiocarcinoma  | Liver Core Needle Biopsy                                           | Alive, 46                   |
| Training   | 5       | M      | 79          | No             | 33.9                    | Hilar                 | Negative / N/S                                  | Brushings                    | <i>Negative</i>                                                                           | Perihilar Cholangiocarcinoma     | Partial Hepatectomy with Segmental Bile Duct Resection             | Decreased, 2                |
| Training   | 6       | F      | 96          | No             | N/S                     | Distal                | N/S / Negative (CG)                             | Biopsy (CG)                  | <i>Negative</i>                                                                           | Distal Cholangiocarcinoma        | Autopsy                                                            | Decreased, 13               |
| Training   | 7       | M      | 73          | No             | 25                      | Distal                | Negative / Negative (CG)                        | Biopsy (CG)                  | <i>Negative</i>                                                                           | Distal Cholangiocarcinoma        | Whipple Resection                                                  | Decreased, 25               |
| Training   | 8       | F      | 57          | No             | 44                      | Hilar                 | N/S / Positive (CG)                             | Biopsy (CG)                  | <i>GNAS p.R201H</i>                                                                       | Perihilar Cholangiocarcinoma     | Concurrent ERCP Biopsy                                             | Alive, 46                   |
| Training   | 9       | F      | 69          | No             | 419                     | Distal                | Negative / N/S                                  | Brushings                    | <i>TP53 p.G199V</i>                                                                       | Gallbladder Adenocarcinoma       | Biopsy of Peritoneal Metastasis                                    | Decreased, 12               |
| Training   | 10      | F      | 92          | No             | 56.8                    | Distal                | N/S / Positive (CS)                             | Biopsy (CS)                  | <i>Negative</i>                                                                           | Distal Cholangiocarcinoma        | Concurrent ERCP Biopsy                                             | Alive, 31                   |
| Training   | 11      | F      | 49          | Yes            | 43                      | Intrahepatic          | Negative / N/S                                  | Brushings                    | <i>Negative</i>                                                                           | Cholangiopathy                   | Liver Transplantation                                              | Alive, 34                   |
| Training   | 12      | M      | 71          | No             | 193                     | Distal                | N/S / Positive (CS)                             | Biopsy (CS)                  | <i>TP53 p.R248W, SMAD4 copy number loss</i>                                               | Distal Cholangiocarcinoma        | Partial Hepatectomy with Segmental Bile Duct Resection             | Alive, 35                   |
| Training   | 13      | M      | 67          | No             | 1551                    | Distal                | Positive / Positive (CG)                        | Biopsy (CG)                  | <i>KRAS p.G12V</i>                                                                        | Pancreatic Ductal Adenocarcinoma | Whipple Resection                                                  | Alive, 35                   |
| Training   | 14      | M      | 65          | No             | 120.7                   | Distal                | Negative / N/S                                  | Biopsy (CG)                  | <i>KRAS p.G12A</i>                                                                        | Distal Cholangiocarcinoma        | Clinicoradiographic Impression                                     | Alive, 34                   |
| Training   | 15      | M      | 51          | No             | 13.2                    | Intrahepatic          | N/S / Positive (CS)                             | Biopsy (CS)                  | <i>ERBB2 p.V777L, TP53 p.R273G, TP53 copy number loss, CDKN2A p.P70del, CTNNB1 p.S45F</i> | Intrahepatic Cholangiocarcinoma  | Partial Hepatectomy                                                | Decreased, 21               |
| Training   | 16      | M      | 70          | No             | 49.6                    | Hilar                 | N/S / Positive (CS)                             | Biopsy (CS)                  | <i>KRAS p.G12D, CTNNB1 p.S45Y</i>                                                         | Perihilar Cholangiocarcinoma     | Autopsy                                                            | Decreased, 15               |
| Training   | 17      | M      | 57          | No             | 16.7                    | Distal                | N/S / Negative (CG)                             | Biopsy (CG)                  | <i>Negative</i>                                                                           | Distal Cholangiocarcinoma        | Whipple Resection                                                  | Alive, 49                   |
| Training   | 18      | F      | 81          | No             | 14                      | Hilar                 | N/S / Negative (CS)                             | Biopsy (CS)                  | <i>KRAS p.G12R</i>                                                                        | Perihilar Cholangiocarcinoma     | Subsequent ERCP Biopsy                                             | Decreased, 6                |
| Training   | 19      | F      | 61          | Yes            | 2498.5                  | Intrahepatic          | Negative / N/S                                  | Brushings                    | <i>KRAS p.G12V, TP53 p.R280T, CDKN2A copy number loss</i>                                 | Intrahepatic Cholangiocarcinoma  | Liver Core Needle Biopsy                                           | Decreased, 4                |
| Training   | 20      | F      | 54          | No             | 278.4                   | Hilar                 | Negative / N/S                                  | Brushings                    | <i>Negative</i>                                                                           | Perihilar Cholangiocarcinoma     | Liver EUS-FNA                                                      | Decreased, 8                |
| Training   | 21      | M      | 45          | No             | 7.8                     | Intrahepatic          | Negative / N/S                                  | Brushings                    | <i>Negative</i>                                                                           | Cholangiopathy                   | Liver Transplantation                                              | Alive, 30                   |
| Training   | 22      | M      | 64          | No             | 66                      | Distal                | Negative / N/S                                  | Biopsy (CS)                  | <i>Negative</i>                                                                           | Cholangiopathy                   | Clinicoradiographic Impression                                     | Alive, 35                   |
| Training   | 23      | F      | 34          | No             | 23                      | Distal                | N/S / Negative (CG)                             | Biopsy (CG)                  | <i>Negative</i>                                                                           | Cholangiopathy                   | Clinicoradiographic Impression                                     | Alive, 30                   |
| Training   | 24      | M      | 42          | No             | 10.2                    | Distal                | Negative / N/S                                  | Brushings                    | <i>Negative</i>                                                                           | Cholangiopathy                   | Clinicoradiographic Impression                                     | Alive, 31                   |
| Training   | 25      | M      | 78          | No             | 118.9                   | Intrahepatic          | Negative / Negative (CG)                        | Biopsy (CG)                  | <i>Negative</i>                                                                           | Cholangiopathy                   | Clinicoradiographic Impression                                     | Alive, 36                   |
| Training   | 26      | M      | 74          | No             | 11.4                    | Distal                | Positive / Negative (CG)                        | Biopsy (CG)                  | <i>Negative</i>                                                                           | Distal Cholangiocarcinoma        | Whipple Resection                                                  | Decreased, 9                |
| Training   | 27      | M      | 36          | No             | 4                       | Distal                | Negative / N/S                                  | Brushings                    | <i>Negative</i>                                                                           | Cholangiopathy                   | Clinicoradiographic Impression                                     | Alive, 33                   |
| Training   | 28      | M      | 80          | No             | 1841.9                  | Intrahepatic          | Negative / N/S                                  | Brushings                    | <i>Negative</i>                                                                           | Cholangiopathy                   | Clinicoradiographic Impression                                     | Alive, 30                   |
| Training   | 29      | F      | 92          | No             | 20000                   | Intrahepatic          | Negative / N/S                                  | Brushings                    | <i>KRAS p.G12D, TP53 p.R306*</i>                                                          | Perihilar Cholangiocarcinoma     | Clinicoradiographic Impression                                     | Decreased, 12               |
| Training   | 30      | M      | 64          | Yes            | 3587                    | Distal                | N/S / Negative (CG)                             | Biopsy (CG)                  | <i>KRAS p.G13D</i>                                                                        | Distal Cholangiocarcinoma        | Biopsy of Liver Metastasis                                         | Decreased, 27               |
| Training   | 31      | M      | 85          | No             | 28.1                    | Distal                | N/S / Positive (CS)                             | Biopsy (CS)                  | <i>TP53 c.902-1_931del</i>                                                                | Distal Cholangiocarcinoma        | Concurrent ERCP Biopsy                                             | Decreased, 23               |
| Training   | 32      | F      | 75          | No             | 20.5                    | Distal                | Negative / N/S                                  | Brushings                    | <i>Negative</i>                                                                           | Cholangiopathy                   | Clinicoradiographic Impression                                     | Alive, 50                   |
| Training   | 33      | F      | 73          | No             | 249                     | Distal                | N/S / Negative (CG)                             | Biopsy (CG)                  | <i>KRAS p.G12D, TP53 p.C275F</i>                                                          | Distal Cholangiocarcinoma        | Clinicoradiographic Impression                                     | Decreased, 13               |
| Training   | 34      | M      | 72          | Yes            | 39                      | Intrahepatic          | Negative / N/S                                  | Brushings                    | <i>GNAS p.R201C</i>                                                                       | Intrahepatic Cholangiocarcinoma  | Clinicoradiographic Impression                                     | Alive, 36                   |
| Training   | 35      | M      | 57          | No             | 148                     | Intrahepatic          | N/S / Positive (CS)                             | Biopsy (CS)                  | <i>FGFR2 amplification, TP53 p.G244R</i>                                                  | Intrahepatic Cholangiocarcinoma  | Liver Core Needle Biopsy                                           | Decreased, 1                |
| Training   | 36      | M      | 26          | Yes            | 316.4                   | Distal                | Negative / N/S                                  | Brushings                    | <i>Negative</i>                                                                           | Cholangiopathy                   | Clinicoradiographic Impression                                     | Alive, 35                   |
| Training   | 37      | F      | 55          | No             | 34793                   | Hilar                 | N/S / Negative (CG)                             | Biopsy (CG)                  | <i>ALK copy number gain</i>                                                               | Perihilar Cholangiocarcinoma     | Biopsy of Small Intestinal Metastasis                              | Decreased, 14               |
| Training   | 38      | F      | 85          | No             | 12                      | Intrahepatic          | Negative / Negative (CS)                        | Biopsy (CS)                  | <i>Negative</i>                                                                           | Cholangiopathy                   | Clinicoradiographic Impression                                     | Alive, 28                   |
| Training   | 39      | F      | 65          | No             | 60                      | Hilar                 | N/S / Positive (CG)                             | Biopsy (CG)                  | <i>Negative</i>                                                                           | Perihilar Cholangiocarcinoma     | Concurrent ERCP Biopsy and Subsequent Omental Metastasis Biopsy    | Decreased, 1                |
| Training   | 40      | F      | 61          | No             | 362                     | Hilar                 | Negative / Negative (CG)                        | Both (CG)                    | <i>Both Specimens: Negative</i>                                                           | Gallbladder Adenocarcinoma       | Cholecystectomy with Partial Hepatectomy                           | Decreased, 6                |
| Training   | 41      | M      | 79          | No             | 3302                    | Hilar                 | Negative / Negative (CG)                        | Biopsy (CG)                  | <i>Negative</i>                                                                           | Perihilar Cholangiocarcinoma     | Autopsy                                                            | Decreased, 12               |
| Training   | 42      | F      | 76          | No             | 22                      | Distal                | Negative / Negative (CS)                        | Biopsy (CS)                  | <i>Negative</i>                                                                           | Gallbladder Adenocarcinoma       | Cholecystectomy with Partial Hepatectomy                           | Alive, 29                   |
| Training   | 43      | M      | 81          | Yes            | 219.2                   | Distal                | Negative / Negative (CG)                        | Biopsy (CG)                  | <i>Negative</i>                                                                           | Cholangiopathy                   | Clinicoradiographic Impression                                     | Alive, 28                   |
| Training   | 44      | F      | 53          | Yes            | 38.1                    | Intrahepatic          | Negative / Negative (CG)                        | Biopsy (CG)                  | <i>Negative</i>                                                                           | Cholangiopathy                   | Liver Transplantation                                              | Alive, 35                   |
| Training   | 45      | F      | 75          | No             | 17                      | Distal                | Negative / Negative (CG)                        | Both (CG)                    | <i>Both Specimens: Negative</i>                                                           | Cholangiopathy                   | Clinicoradiographic Impression                                     | Alive, 31                   |
| Training   | 46      | F      | 83          | No             | 2.6                     | Intrahepatic          | Negative / N/S                                  | Brushings                    | <i>Negative</i>                                                                           | Cholangiopathy                   | Clinicoradiographic Impression                                     | Alive, 47                   |
| Training   | 47      | M      | 63          | Yes            | 9351                    | Intrahepatic          | Negative / Negative (CS)                        | Biopsy (CS)                  | <i>KRAS p.G13D, GNAS p.R201H</i>                                                          | Perihilar Cholangiocarcinoma     | Biopsy of Gastrohepatic Lymph Node Metastasis                      | Decreased, 14               |
| Training   | 48      | M      | 51          | Yes            | 3.2                     | Distal                | Negative / N/S                                  | Brushings                    | <i>Negative</i>                                                                           | Cholangiopathy                   | Clinicoradiographic Impression                                     | Alive, 34                   |
| Training   | 49      | F      | 62          | No             | 0.8                     | Distal                | N/S / Negative (CG)                             | Biopsy (CG)                  | <i>KRAS p.G12D</i>                                                                        | Pancreatic Ductal Adenocarcinoma | Whipple Resection                                                  | Alive, 38                   |
| Training   | 50      | M      | 84          | No             | 1.2                     | Hilar                 | N/S / Negative (CS)                             | Biopsy (CS)                  | <i>Negative</i>                                                                           | Distal Cholangiocarcinoma        | Whipple Resection                                                  | Decreased, 15               |
| Training   | 51      | M      | 78          | No             | 1                       | Distal                | Negative / N/S                                  | Brushings                    | <i>Negative</i>                                                                           | Cholangiopathy                   | Clinicoradiographic Impression                                     | Alive, 49                   |
| Training   | 52      | M      | 76          | No             | 3                       | Hilar                 | N/S / Positive (CS)                             | Biopsy (CS)                  | <i>Negative</i>                                                                           | Perihilar Cholangiocarcinoma     | Concurrent ERCP Biopsy and Autopsy                                 | Decreased, 3                |
| Training   | 53      | F      | 26          | Yes            | 30                      | Distal                | Negative / N/S                                  | Biopsy (CG)                  | <i>Negative</i>                                                                           | Cholangiopathy                   | Clinicoradiographic Impression                                     | Alive, 35                   |
| Training   | 54      | F      | 52          | Yes            | 35.4                    | Intrahepatic          | Negative / N/S                                  | Brushings                    | <i>Negative</i>                                                                           | Cholangiopathy                   | Clinicoradiographic Impression                                     | Alive, 46                   |
| Training   | 55      | F      | 90          | No             | 0.8                     | Distal                | N/S / Negative (CG)                             | Biopsy (CG)                  | <i>Negative</i>                                                                           | Cholangiopathy                   | Clinicoradiographic Impression                                     | Decreased, 12               |
| Training   | 56      | M      | 54          | Yes            | 29.9                    | Intrahepatic          | Negative / N/S                                  | Brushings                    | <i>Negative</i>                                                                           | Cholangiopathy                   | Clinicoradiographic Impression                                     | Alive, 34                   |
| Training   | 57      | M      | 59          | No             | 20000                   | Distal                | Positive / Positive (CG)                        | Biopsy (CG)                  | <i>KRAS p.G12R, TP53 p.R175H</i>                                                          | Pancreatic Ductal Adenocarcinoma | Concurrent ERCP Biopsy and Subsequent Peritoneal Metastasis Biopsy | Decreased, 10               |
| Validation | 58      | M      | 63          | No             | 20460                   | Distal                | Negative / N/S                                  | Brushings                    | <i>Negative</i>                                                                           | Distal Cholangiocarcinoma        | Clinicoradiographic Impression                                     | Decreased, 14               |
| Validation | 59      | F      | 80          | No             | 5                       | Distal                | N/S / Negative (CG)                             | Biopsy (CG)                  | <i>Negative</i>                                                                           | N/A                              | N/A                                                                | N/A                         |
| Validation | 60      | F      | 55          | No             | 0.8                     | Distal                | Negative / Negative (CG)                        | Biopsy (CG)                  | <i>KRAS p.G12V</i>                                                                        | Pancreatic Ductal Adenocarcinoma | Intraoperative Pancreatic Biopsy                                   | Alive, 12                   |
| Validation | 61      | F      | 85          | No             | 12                      | Distal                | N/S / Negative (CG)                             | Biopsy (CG)                  | <i>Negative</i>                                                                           | Cholangiopathy                   | Clinicoradiographic Impression                                     | Alive, 21                   |
| Validation | 62      | F      | 47          | No             | 184.9                   | Distal                | N/S / Negative (CS)                             | Biopsy (CS)                  | <i>KRAS p.G12D</i>                                                                        | Pancreatic Ductal Adenocarcinoma | Pancreatic EUS-FNA                                                 | Alive, 14                   |
| Validation | 63      | F      | 83          | No             | 10.7                    | Distal                | N/S / Positive (CG)                             | Biopsy (CG)                  | <i>TP53 p.Y205F</i>                                                                       | Ampullary adenocarcinoma         | Concurrent ERCP Biopsy and Subsequent Whipple Resection            | Alive, 10                   |
| Validation | 64      | M      | 84          | No             | N/S                     | Distal                | N/S / Positive (CG)                             | Biopsy (CG)                  | <i>KRAS p.G12C</i>                                                                        | Ampullary adenocarcinoma         | Concurrent ERCP Biopsy and Subsequent Whipple Resection            | Alive, 8                    |
| Validation | 65      | F      | 80          | No             | 289.7                   | Distal                | N/S / Negative (CG)                             | Biopsy (CG)                  | <i>Negative</i>                                                                           | Pancreatic Ductal Adenocarcinoma | Pancreatic EUS-FNA                                                 | Decreased, 2                |
| Validation | 66      | F      | 67          | No             | 77                      | Distal                | Negative / Positive (CG)                        | Biopsy (CG)                  | <i>Negative</i>                                                                           | Distal Cholangiocarcinoma        | Concurrent ERCP Biopsy                                             | Alive, 16                   |
| Validation | 67      | M      | 59          | No             | N/S                     | Distal                | Negative / Negative (CG)                        | Both (CG)                    | <i>Both Specimens: Negative</i>                                                           | N/A                              | N/A                                                                | N/A                         |
| Validation | 68      | M      | 52          | No             | N/S                     | Distal                | Negative / Negative (CG)                        | Both (CG)                    | <i>Both Specimens: Negative</i>                                                           | N/A                              | N/A                                                                | N/A                         |
| Validation | 69      | M      | 89          | No             | 297                     | Distal                | N/S / Negative (CG)                             | Biopsy (CG)                  | <i>Negative</i>                                                                           | Distal Cholangiocarcinoma        | Subsequent ERCP Biopsy                                             | Decreased, 9                |
| Validation | 70      | M      | 71          | No             | 27.8                    | Distal                | N/S / Positive (CG)                             | Biopsy (CG)                  | <i>TP53 p.Y236C</i>                                                                       | Ampullary adenocarcinoma         | Concurrent ERCP Biopsy and Subsequent Whipple Resection            | Alive, 6                    |
| Validation | 71      | M      | 83          | No             | 146                     | Distal                | N/S / Positive (CS)                             | Biopsy (CS)                  | <i>MET p.V184G</i>                                                                        | Distal Cholangiocarcinoma        | Concurrent ERCP Biopsy and Bile Duct Resection                     | Alive, 20                   |
| Validation | 72      | M      | 75          | No             | 8                       | Distal                | N/S / Positive (CG)                             | Biopsy (CG)                  | <i>TP53 p.E349*, CTNNB1 p.S45P</i>                                                        | Gallbladder Adenocarcinoma       | Concurrent ERCP Biopsy and Subsequent Liver Metastasis Biopsy      | Decreased, 1                |
| Validation | 73      | M      | 66          | Yes            | 9.8                     | Distal                | N/S / Negative (CG)                             | Biopsy (CG)                  | <i>Negative</i>                                                                           | Cholangiopathy                   | Clinicoradiographic Impression                                     | Alive, 14                   |
| Validation | 74      | F      | 50          | No             | 19                      | Distal                | N/S / Negative (CS)                             | Biopsy (CS)                  | <i>Negative</i>                                                                           | Distal Cholangiocarcinoma        | Whipple Resection                                                  | Decreased, 17               |
| Validation | 75      | M      | 65          | No             | 1147.8                  | Distal                | Negative / N/S                                  | Brushings                    | <i>KRAS p.G12V</i>                                                                        | Pancreatic Ductal Adenocarcinoma | Whipple Resection                                                  | Alive, 20                   |
| Validation | 76      | M      | 82          | No             | N/S                     | Distal                | Positive / Negative (CG)                        | Both (CG)                    | <i>Both Specimens: KRAS p.G12D, SMAD4 p.G176*</i>                                         | Distal Cholangiocarcinoma        | Clinicoradiographic Impression                                     | Decreased, 15               |
| Validation | 77      | F      | 88          | No             | 15743                   | Distal                | Negative / N/S                                  | Brushings                    | <i>KRAS p.G12D, TP53 p.G245S</i>                                                          | Pancreatic Ductal Adenocarcinoma | Pancreatic EUS-FNA                                                 | Alive, 7                    |
| Validation | 78      | M      | 58          | No             | 61                      | Hilar                 | Negative / Negative (CS)                        | Biopsy (CS)                  | <i>Negative</i>                                                                           | Intrahepatic Cholangiocarcinoma  | Partial Hepatectomy                                                | Alive, 21                   |
| Validation | 79      | F      | 79          | No             | 164                     | Hilar                 | N/S / Negative (CG)                             | Biopsy (CG)                  | <i>Negative</i>                                                                           | Perihilar Cholangiocarcinoma     | Subsequent ERCP Biopsy                                             | Decreased, 1                |
| Validation | 80      | F      | 78          | No             | 880.5                   | Distal                | Positive / Positive (CG)                        | Both (CG)                    | <i>Both Specimens: TP53 p.H179Y, SMAD4 p.R361H</i>                                        | Distal Cholangiocarcinoma        | Concurrent ERCP Biopsy and Subsequent Omental Metastasis Biopsy    | Alive, 16                   |
| Validation | 81      | F      | 81          | No             | N/S                     | Distal                | Negative / Negative (CG)                        | Biopsy (CG)                  | <i>Negative</i>                                                                           | Cholangiopathy                   | Clinicoradiographic Impression                                     | Alive, 17                   |
| Validation | 82      | F      | 88          | No             | 45.1                    | Distal                | Negative / Negative (CG)                        | Both (CG)                    | <i>Both Specimens: KRAS p.G12V, GNAS p.R201C, CDKN2A p.W110*</i>                          | Pancreatic Ductal Adenocarcinoma | Pancreatic EUS-FNA                                                 | Decreased, 3                |
| Validation | 83      | M      | 73          | No             | 480                     | Hilar                 | Negative / Negative (CS)                        | Biopsy (CS)                  | <i>Negative</i>                                                                           | Perihilar Cholangiocarcinoma     | Intraoperative Liver Biopsy                                        | Alive, 15                   |
| Validation | 84      | F      | 56          | No             | 2933.2                  | Distal                | Negative / N/S                                  | Brushings                    | <i>KRAS p.G12D</i>                                                                        | Pancreatic Ductal Adenocarcinoma | Pancreatic EUS-FNA                                                 | Decreased, 6                |
| Validation | 85      | F      | 67          | No             | 109                     | Distal                | N/S / Negative (CG)                             | Biopsy (CG)                  | <i>Negative</i>                                                                           | Cholangiopathy                   | Clinicoradiographic Impression                                     | Alive, 21                   |
| Validation | 86      | F      | 67          | No             | 20000                   | Distal                | Negative / Positive (CG)                        | Biopsy (CG)                  | <i>TP53 p.R273H, CTNNB1 p.S45P</i>                                                        | Distal Cholangiocarcinoma        | Concurrent ERCP Biopsy and Subsequent Peritoneal Metastasis Biopsy | Decreased, 5                |
| Validation | 87      | F      | 73          | No             | 32.7                    | Distal                | Negative / Negative (CG)                        | Both (CG)                    | <i>Brushings: KRAS p.G12V, CDKN2A p.T77fs*69; Biopsy: Negative</i>                        | Pancreatic Ductal Adenocarcinoma | Whipple Resection                                                  | Alive, 10                   |
| Validation | 88      | M      | 61          | No             | N/S                     | Distal                | Negative / Negative (CG)                        | Biopsy (CG)                  | <i>Negative</i>                                                                           | Cholangiopathy                   | Liver Biopsy and Clinicoradiographic Impression                    | Decreased, 13               |
| Validation | 89      | M      | 53          | No             | 61                      | Hilar                 | Negative / Negative (CS)                        | Both (CS)                    | <i>Both Specimens: Negative</i>                                                           | N/A                              | N/A                                                                | N/A                         |
| Validation | 90      | M      | 83          | No             | 3821                    | Hilar                 | Positive / Positive (CG)                        | Both (CG)                    | <i>Both Specimens: TP53 p.W91*, CDKN2A p.W110*, SMAD4 p.R496H</i>                         | Intrahepatic Cholangiocarcinoma  | Concurrent ERCP Biopsy and Partial Hepatectomy                     | Alive, 6                    |
| Validation | 91      | F      | 59          | Yes            | 97.7                    | Distal                | Negative / Negative (CG)                        | Biopsy (CG)                  | <i>Negative</i>                                                                           | Cholangiopathy                   | Clinicoradiographic Impression                                     | Alive, 18                   |
| Validation | 92      | M      | 78          | Yes            | 238                     | Distal                | N/S / Negative (CG)                             | Biopsy (CG)                  | <i>Negative</i>                                                                           | Cholangiopathy                   | Clinicoradiographic Impression                                     | Decreased, 21               |
| Validation | 93      | F      | 72          | No             | 837.3                   | Hilar                 | Positive / Positive (CG)                        | Biopsy (CG)                  | <i>KRAS p.G12D, TP53 p.L206Wfs*41</i>                                                     | Distal Cholangiocarcinoma        | Concurrent ERCP Biopsy and Subsequent Whipple Resection            | Decreased, 3                |
| Validation | 94      | F      | 86          | No             | 131.7                   | Distal                | N/S / Negative (CG)                             | Biopsy (CG)                  | <i>PIK3CA p.E545K, TP53 copy number loss, CDKN2A copy number loss</i>                     | Distal Cholangiocarcinoma        | Clinicoradiographic Impression                                     | Alive, 12                   |
| Validation | 95      | M      | 72          | No             | 303                     | Hilar                 | Negative / N/S                                  | Brushings                    | <i>KRAS p.G12D, TP53 p.W91*</i>                                                           | Perihilar Cholangiocarcinoma     | Autopsy                                                            | Decreased, 1                |
| Validation | 96      | M      | 81          | No             | 760.8                   | Hilar                 | Negative / N/S                                  | Brushings                    | <i>Negative</i>                                                                           | Cholangiopathy                   | Clinicoradiographic Impression                                     | Alive, 20                   |
| Validation | 97      | F      | 46          | Yes            | 226                     | Intrahepatic          | Negative / N/S                                  | Brushings                    | <i>Negative</i>                                                                           | Intrahepatic Cholangiocarcinoma  | Liver Core Needle Biopsy                                           | Alive, 20                   |

|            |     |   |    |     |        |              |                          |             |                                                                             |                                       |                                                                     |               |
|------------|-----|---|----|-----|--------|--------------|--------------------------|-------------|-----------------------------------------------------------------------------|---------------------------------------|---------------------------------------------------------------------|---------------|
| Validation | 98  | F | 70 | No  | 20000  | Distal       | Negative / Negative (CG) | Biopsy (CG) | Negative                                                                    | Distal Cholangiocarcinoma             | Biliary EUS-FNA                                                     | Alive, 8      |
| Validation | 99  | F | 60 | No  | 4126.1 | Distal       | Positive / Positive (CG) | Biopsy (CG) | KRAS p.G12V, TP53 p.R175H                                                   | Pancreatic Ductal Adenocarcinoma      | Concurrent ERCP Biopsy and Pancreatic EUS-FNA                       | Alive, 10     |
| Validation | 100 | M | 60 | No  | 81     | Distal       | N/S / Negative (CS)      | Biopsy (CS) | Negative                                                                    | Cholangiopathy                        | Clinicoradiographic Impression                                      | Decreased, 24 |
| Validation | 101 | F | 65 | No  | 453.6  | Hilar        | N/S / Positive (CG)      | Biopsy (CG) | MET copy number gain, TP53 p.R280I                                          | Distal Cholangiocarcinoma             | Concurrent ERCP Biopsy and Ascitic Fluid Evaluation                 | Alive, 15     |
| Validation | 102 | M | 80 | No  | 30.3   | Distal       | Negative / Negative (CG) | Biopsy (CG) | Negative                                                                    | Cholangiopathy                        | Clinicoradiographic Impression                                      | Alive, 17     |
| Validation | 103 | M | 66 | No  | 187.8  | Distal       | N/S / Positive (CG)      | Biopsy (CG) | FGFR3 amplification, TP53 p.C176del, PIK3CA p.E542K, SMAD4 copy number loss | Distal Cholangiocarcinoma             | Segmental Bile Duct Resection                                       | Alive, 8      |
| Validation | 104 | M | 54 | No  | 49.5   | Distal       | Negative / Negative (CG) | Biopsy (CG) | Negative                                                                    | N/A                                   | N/A                                                                 | N/A           |
| Validation | 105 | F | 55 | No  | 16     | Distal       | Negative / N/S           | Brushings   | Negative                                                                    | Cholangiopathy                        | Clinicoradiographic Impression                                      | Alive, 22     |
| Validation | 106 | M | 45 | Yes | 12     | Distal       | Negative / Negative (CG) | Biopsy (CG) | Negative                                                                    | Cholangiopathy                        | Clinicoradiographic Impression                                      | Alive, 24     |
| Validation | 107 | M | 73 | No  | 207    | Hilar        | Positive / Positive (CG) | Both (CG)   | Both Specimens: KRAS p.G12A, TP53 p.A161T                                   | Perihilar Cholangiocarcinoma          | Concurrent ERCP Biopsy and Subsequent Partial Hepatectomy           | Alive, 21     |
| Validation | 108 | F | 59 | No  | N/S    | Intrahepatic | N/S / Negative (CG)      | Biopsy (CG) | Negative                                                                    | Cholangiopathy                        | Clinicoradiographic Impression                                      | Decreased, 22 |
| Validation | 109 | M | 76 | No  | 20.6   | Distal       | Negative / N/S           | Brushings   | Negative                                                                    | Cholangiopathy                        | Whipple Resection                                                   | Alive, 21     |
| Validation | 110 | M | 33 | No  | N/S    | Intrahepatic | Negative / N/S           | Brushings   | Negative                                                                    | N/A                                   | N/A                                                                 | N/A           |
| Validation | 111 | M | 91 | No  | 4953   | Intrahepatic | Positive / Positive (CG) | Biopsy (CG) | KRAS amplification, GNAS p.R201H                                            | Intrahepatic Cholangiocarcinoma       | Concurrent ERCP Biopsy                                              | Decreased, 2  |
| Validation | 112 | M | 61 | No  | 211.2  | Distal       | N/S / Positive (CG)      | Biopsy (CG) | KRAS p.G12D                                                                 | Pancreatic Ductal Adenocarcinoma      | Concurrent ERCP Biopsy                                              | Alive, 11     |
| Validation | 113 | M | 54 | Yes | 1033.4 | Intrahepatic | Negative / N/S           | Brushings   | KRAS p.G12V, TP53 c.376-2A>G, splice site                                   | Intrahepatic Cholangiocarcinoma       | Clinicoradiographic Impression                                      | Alive, 25     |
| Validation | 114 | F | 72 | No  | 133.3  | Intrahepatic | Negative / N/S           | Brushings   | Negative                                                                    | Cholangiopathy                        | Clinicoradiographic Impression                                      | Alive, 23     |
| Validation | 115 | M | 76 | No  | 251    | Distal       | Negative / Positive (CG) | Both (CG)   | Both Specimens: KRAS p.G12C, ATM p.G1676E                                   | Ampullary adenocarcinoma              | Concurrent ERCP Biopsy and Subsequent Whipple Resection             | Decreased, 10 |
| Validation | 116 | F | 77 | No  | 200    | Distal       | Positive / Positive (CG) | Both (CG)   | Both Specimens: KRAS p.G12D, TP53 p.R213*                                   | Distal Cholangiocarcinoma             | Concurrent ERCP Biopsy and Subsequent Liver Metastasis Biopsy       | Decreased, 8  |
| Validation | 117 | F | 77 | No  | 38     | Distal       | N/S / Negative (CG)      | Biopsy (CG) | KRAS p.G12D, TP53 p.R282W                                                   | Pancreatic Ductal Adenocarcinoma      | Whipple Resection                                                   | Alive, 9      |
| Validation | 118 | F | 71 | No  | 27     | Distal       | N/S / Negative (CG)      | Biopsy (CG) | Negative                                                                    | Cholangiopathy                        | Clinicoradiographic Impression                                      | Alive, 19     |
| Validation | 119 | F | 74 | No  | 10     | Intrahepatic | N/S / Positive (CG)      | Biopsy (CG) | KRAS p.G12D                                                                 | Intrahepatic Cholangiocarcinoma       | Partial Hepatectomy                                                 | Alive, 15     |
| Validation | 120 | F | 53 | No  | N/S    | Distal       | Negative / N/S           | Brushings   | Negative                                                                    | Cholangiopathy                        | Clinicoradiographic Impression                                      | Alive, 13     |
| Validation | 121 | F | 73 | No  | 41     | Intrahepatic | Negative / N/S           | Brushings   | GNAS p.R201H                                                                | N/A                                   | N/A                                                                 | N/A           |
| Validation | 122 | M | 56 | No  | 4664.2 | Distal       | N/S / Positive (CG)      | Biopsy (CG) | KRAS p.G12V                                                                 | Pancreatic Ductal Adenocarcinoma      | Concurrent ERCP Biopsy and Pancreatic EUS-FNA                       | Decreased, 7  |
| Validation | 123 | F | 84 | No  | 4      | Distal       | Negative / Negative (CG) | Biopsy (CG) | NRAS p.G12S, BRAF p.G469R, PIK3CA p.C420R                                   | Distal Cholangiocarcinoma             | Biopsy of Peri-celiac Lymph Node Metastasis                         | Alive, 21     |
| Validation | 124 | M | 62 | No  | N/S    | Hilar        | Negative / N/S           | Brushings   | TP53 p.R175H, CDKN2A copy number loss                                       | Perihilar Cholangiocarcinoma          | Partial Hepatectomy                                                 | Decreased, 5  |
| Validation | 125 | F | 77 | Yes | 294.3  | Intrahepatic | N/S / Positive (CS)      | Biopsy (CS) | KRAS p.G12D                                                                 | Intrahepatic Cholangiocarcinoma       | Concurrent ERCP Biopsy and Subsequent Liver Core Needle Biopsy      | Decreased, 1  |
| Validation | 126 | M | 89 | No  | 2190.2 | Distal       | Negative / Negative (CG) | Both (CG)   | Both Specimens: TP53 p.A161D                                                | Distal Cholangiocarcinoma             | Clinicoradiographic Impression                                      | Alive, 25     |
| Validation | 127 | M | 40 | No  | 525.7  | Distal       | Positive / Positive (CG) | Both (CG)   | Both Specimens: Negative                                                    | Distal Cholangiocarcinoma             | Concurrent ERCP Biopsy and Subsequent Segmental Bile Duct Resection | Alive, 14     |
| Validation | 128 | F | 60 | Yes | N/S    | Intrahepatic | Negative / N/S           | Brushings   | Negative                                                                    | N/A                                   | N/A                                                                 | N/A           |
| Validation | 129 | M | 64 | No  | N/S    | Distal       | N/S / Negative (CG)      | Biopsy (CG) | Negative                                                                    | N/A                                   | N/A                                                                 | N/A           |
| Validation | 130 | M | 61 | No  | 48     | Distal       | Negative / N/S           | Brushings   | KRAS p.G12V, TP53 p.H168Q                                                   | Distal Cholangiocarcinoma             | Whipple Resection                                                   | Alive, 24     |
| Validation | 131 | M | 57 | No  | 23     | Distal       | Negative / N/S           | Brushings   | TP53 p.C238Y                                                                | Pancreatic Ductal Adenocarcinoma      | Pancreatic EUS-FNA                                                  | Alive, 9      |
| Validation | 132 | M | 34 | Yes | 25.7   | Intrahepatic | Negative / N/S           | Brushings   | Negative                                                                    | Cholangiopathy                        | Liver Transplantation                                               | Alive, 19     |
| Validation | 133 | F | 82 | No  | 4616.1 | Distal       | Negative / N/S           | Brushings   | KRAS p.G12D, TP53 p.R248Q                                                   | Pancreatic Ductal Adenocarcinoma      | Pancreatic EUS-FNA                                                  | Decreased, 6  |
| Validation | 134 | F | 56 | No  | 9.9    | Distal       | Negative / Negative (CG) | Both (CG)   | Both Specimens: Negative                                                    | Cholangiopathy                        | Clinicoradiographic Impression                                      | Alive, 18     |
| Validation | 135 | F | 86 | No  | 4255.1 | Hilar        | Negative / N/S           | Brushings   | Negative                                                                    | Cholangiopathy                        | Liver Core Needle Biopsy and Clinicoradiographic Impression         | Decreased, 8  |
| Validation | 136 | M | 76 | No  | 319    | Distal       | Negative / N/S           | Brushings   | KRAS p.G12D, TP53 p.C238F, CDKN2A p.E69*, CDKN2A p.L78Hfs*41                | Pancreatic Ductal Adenocarcinoma      | Whipple Resection                                                   | Alive, 16     |
| Validation | 137 | M | 83 | No  | 248.1  | Distal       | Negative / Negative (CG) | Biopsy (CG) | TP53 p.R249S                                                                | N/A                                   | N/A                                                                 | N/A           |
| Validation | 138 | M | 75 | No  | 1722   | Distal       | Negative / Negative (CG) | Biopsy (CG) | Negative                                                                    | Pancreatic Ductal Adenocarcinoma      | Pancreatic EUS-FNA                                                  | Decreased, 7  |
| Validation | 139 | M | 73 | No  | 1202   | Distal       | N/S / Negative (CG)      | Biopsy (CG) | Negative                                                                    | Distal Cholangiocarcinoma             | Clinicoradiographic Impression                                      | Alive, 19     |
| Validation | 140 | M | 68 | No  | 84     | Distal       | N/S / Negative (CG)      | Biopsy (CG) | Negative                                                                    | Pancreatic Ductal Adenocarcinoma      | Pancreatic EUS-FNA                                                  | Alive, 5      |
| Validation | 141 | F | 67 | No  | 21     | Distal       | N/S / Negative (CS)      | Biopsy (CS) | Negative                                                                    | Cholangiopathy                        | Clinicoradiographic Impression                                      | Alive, 12     |
| Validation | 142 | M | 81 | No  | 25     | Distal       | Negative / N/S           | Brushings   | Negative                                                                    | Pancreatic Ductal Adenocarcinoma      | Pancreatic EUS-FNA                                                  | Decreased, 5  |
| Validation | 143 | M | 96 | No  | 189.7  | Hilar        | N/S / Positive (CG)      | Biopsy (CG) | FGFR3 p.A261Gfs*22, TP53, p.P191del                                         | Distal Cholangiocarcinoma             | Concurrent ERCP Biopsy                                              | Decreased, 1  |
| Validation | 144 | M | 66 | No  | N/S    | Distal       | Negative / N/S           | Brushings   | Negative                                                                    | Cholangiopathy                        | Clinicoradiographic Impression                                      | Alive, 13     |
| Validation | 145 | M | 88 | No  | 17000  | Distal       | N/S / Positive (CG)      | Biopsy (CG) | Negative                                                                    | Distal Cholangiocarcinoma             | Concurrent ERCP Biopsy and Subsequent Peritoneal Metastasis Biopsy  | Decreased, 1  |
| Validation | 146 | F | 70 | No  | 1197   | Hilar        | Positive / Positive (CS) | Biopsy (CS) | FGFR2 amplification, PIK3CA p.G1049R                                        | Distal Cholangiocarcinoma             | Autopsy                                                             | Decreased, 1  |
| Validation | 147 | F | 53 | Yes | 3      | Hilar        | Negative / N/S           | Brushings   | Negative                                                                    | Cholangiopathy                        | Clinicoradiographic Impression                                      | Alive, 21     |
| Validation | 148 | M | 70 | No  | 159    | Distal       | Negative / Negative (CG) | Both (CG)   | Both Specimens: KRAS p.G12D, CDKN2A p.R80*                                  | Pancreatic Ductal Adenocarcinoma      | Pancreatic EUS-FNA                                                  | Decreased, 4  |
| Validation | 149 | M | 55 | No  | N/S    | Distal       | N/S / Negative (CG)      | Biopsy (CG) | Negative                                                                    | Cholangiopathy                        | Clinicoradiographic Impression                                      | Alive, 19     |
| Validation | 150 | M | 60 | No  | 6      | Intrahepatic | Positive / Positive (CG) | Biopsy (CG) | KRAS p.G12D                                                                 | Intrahepatic Cholangiocarcinoma       | Concurrent ERCP Biopsy and Subsequent Liver Core Needle Biopsy      | Decreased, 7  |
| Validation | 151 | F | 72 | No  | 4.2    | Distal       | Negative / Negative (CG) | Both (CG)   | Both Specimens: Negative                                                    | N/A                                   | N/A                                                                 | N/A           |
| Validation | 152 | F | 71 | No  | 258    | Distal       | Negative / N/S           | Brushings   | Negative                                                                    | Pancreatic Ductal Adenocarcinoma      | Intraoperative Pancreatic Biopsy                                    | Decreased, 1  |
| Validation | 153 | F | 55 | No  | 90.4   | Hilar        | Negative / Negative (CS) | Both (CS)   | Both Specimens: Negative                                                    | N/A                                   | N/A                                                                 | N/A           |
| Validation | 154 | M | 66 | No  | N/S    | Distal       | N/S / Negative (CG)      | Biopsy (CG) | KRAS p.G12R                                                                 | Ampullary adenocarcinoma              | Whipple Resection                                                   | Alive, 12     |
| Validation | 155 | M | 66 | No  | 53     | Distal       | Negative / Negative (CG) | Both (CG)   | Both Specimens: Negative                                                    | Cholangiopathy                        | Clinicoradiographic Impression                                      | Alive, 13     |
| Validation | 156 | M | 80 | No  | 3035.1 | Distal       | Negative / N/S           | Brushings   | TP53 p.R158H                                                                | Gallbladder Adenocarcinoma            | Subsequent ERCP Biopsy                                              | Decreased, 1  |
| Validation | 157 | F | 73 | No  | 55     | Intrahepatic | Negative / N/S           | Brushings   | ERBB2 amplification, TP53 p.C242fs*5                                        | Intrahepatic Cholangiocarcinoma       | Subsequent ERCP Biopsy                                              | Alive, 23     |
| Validation | 158 | F | 70 | No  | 29     | Distal       | N/S / Positive (CG)      | Biopsy (CG) | KRAS p.G12V, TP53 p.P85Lfs*38, SMAD4 copy number loss                       | Distal Cholangiocarcinoma             | Concurrent ERCP Biopsy and Subsequent Whipple Resection             | Alive, 10     |
| Validation | 159 | F | 61 | No  | N/S    | Distal       | Negative / Negative (CG) | Both (CG)   | Both Specimens: Negative                                                    | N/A                                   | N/A                                                                 | N/A           |
| Validation | 160 | M | 87 | No  | 23     | Distal       | N/S / Negative (CG)      | Biopsy (CG) | Negative                                                                    | Cholangiopathy                        | Clinicoradiographic Impression                                      | Decreased, 21 |
| Validation | 161 | M | 79 | No  | 81.6   | Distal       | Negative / N/S           | Brushings   | Negative                                                                    | N/A                                   | N/A                                                                 | N/A           |
| Validation | 162 | F | 61 | No  | N/S    | Distal       | N/S / Negative (CG)      | Biopsy (CG) | Negative                                                                    | Cholangiopathy                        | Clinicoradiographic Impression                                      | Alive, 12     |
| Validation | 163 | F | 80 | No  | 2890.7 | Distal       | Negative / N/S           | Brushings   | Negative                                                                    | Distal Cholangiocarcinoma             | Subsequent ERCP Biopsy                                              | Alive, 17     |
| Validation | 164 | M | 54 | No  | N/S    | Distal       | Negative / Negative (CG) | Biopsy (CG) | Negative                                                                    | N/A                                   | N/A                                                                 | N/A           |
| Validation | 165 | M | 65 | No  | 405.3  | Distal       | Negative / N/S           | Brushings   | Negative                                                                    | N/A                                   | N/A                                                                 | N/A           |
| Validation | 166 | M | 54 | No  | 2383   | Hilar        | Positive / Positive (CG) | Biopsy (CG) | ERBB2 amplification, TP53 copy number loss, CDKN2A copy number loss         | Perihilar Cholangiocarcinoma          | Concurrent ERCP Biopsy                                              | Alive, 17     |
| Validation | 167 | F | 83 | No  | 15.6   | Distal       | Negative / N/S           | Brushings   | Negative                                                                    | Cholangiopathy                        | Clinicoradiographic Impression                                      | Alive, 22     |
| Validation | 168 | M | 88 | No  | 226    | Distal       | Negative / Negative (CG) | Both (CG)   | Both Specimens: KRAS p.G12D                                                 | Pancreatic Ductal Adenocarcinoma      | Biopsy of Peri-pancreatic Lymph Node Metastasis                     | Decreased, 3  |
| Validation | 169 | F | 77 | No  | N/S    | Distal       | Negative / N/S           | Brushings   | Negative                                                                    | N/A                                   | N/A                                                                 | N/A           |
| Validation | 170 | M | 46 | Yes | 12     | Distal       | Negative / N/S           | Brushings   | Negative                                                                    | Cholangiopathy                        | Clinicoradiographic Impression                                      | Alive, 26     |
| Validation | 171 | F | 81 | No  | N/S    | Distal       | Negative / Negative (CG) | Both (CG)   | Both Specimens: Negative                                                    | N/A                                   | N/A                                                                 | N/A           |
| Validation | 172 | M | 52 | No  | 2950.6 | Distal       | Positive / Positive (CG) | Biopsy (CG) | MET copy number gain, TP53 p.E198*                                          | Distal Cholangiocarcinoma             | Concurrent ERCP Biopsy                                              | Decreased, 3  |
| Validation | 173 | M | 65 | Yes | 537    | Hilar        | N/S / Negative (CG)      | Biopsy (CG) | KRAS p.G12R, TP53 p.N131I                                                   | Intrahepatic Cholangiocarcinoma       | Autopsy                                                             | Decreased, 6  |
| Validation | 174 | M | 83 | No  | 6      | Distal       | Negative / Negative (CS) | Both (CS)   | Both Specimens: Negative                                                    | N/A                                   | N/A                                                                 | N/A           |
| Validation | 175 | M | 57 | No  | 43     | Distal       | Negative / Negative (CS) | Both (CS)   | Both Specimens: Negative                                                    | Cholangiopathy                        | Clinicoradiographic Impression                                      | Alive, 14     |
| Validation | 176 | F | 77 | No  | 195.8  | Hilar        | Negative / Negative (CG) | Biopsy (CG) | FGFR2 p.S252W                                                               | Intrahepatic Cholangiocarcinoma       | Clinicoradiographic Impression                                      | Alive, 15     |
| Validation | 177 | M | 68 | Yes | 6      | Intrahepatic | Negative / Negative (CS) | Biopsy (CS) | TP53 p.F338Lfs*6, CDKN2A p.R80*                                             | High-grade dysplasia of the bile duct | Partial Hepatectomy                                                 | Alive, 12     |
| Validation | 178 | M | 61 | No  | 47.1   | Distal       | Negative / Negative (CG) | Both (CG)   | Both Specimens: KRAS p.G12V                                                 | Pancreatic Ductal Adenocarcinoma      | Pancreatic EUS-FNA                                                  | Alive, 10     |
| Validation | 179 | F | 74 | Yes | 40     | Distal       | Negative / Negative (CG) | Biopsy (CG) | Negative                                                                    | Cholangiopathy                        | Clinicoradiographic Impression                                      | Alive, 15     |
| Validation | 180 | M | 71 | Yes | N/S    | Distal       | Negative / Negative (CG) | Both (CG)   | Both Specimens: Negative                                                    | N/A                                   | N/A                                                                 | N/A           |
| Validation | 181 | F | 73 | Yes | 5      | Distal       | Negative / N/S           | Brushings   | Negative                                                                    | Cholangiopathy                        | Clinicoradiographic Impression                                      | Alive, 18     |
| Validation | 182 | F | 58 | No  | 15.5   | Distal       | N/S / Negative (CG)      | Biopsy (CG) | Negative                                                                    | N/A                                   | N/A                                                                 | N/A           |
| Validation | 183 | M | 68 | No  | 4775.7 | Distal       | Negative / Positive (CG) | Both (CG)   | Both Specimens: KRAS p.G12D, TP53 p.R282W                                   | Pancreatic Ductal Adenocarcinoma      | Concurrent ERCP Biopsy and Pancreatic EUS-FNA                       | Alive, 6      |
| Validation | 184 | M | 72 | No  | 133.4  | Hilar        | Negative / Positive (CG) | Both (CG)   | Both Specimens: KRAS p.G12V                                                 | Perihilar Cholangiocarcinoma          | Concurrent ERCP Biopsy and Subsequent Partial Hepatectomy           | Alive, 16     |
| Validation | 185 | M | 22 | Yes | 13.3   | Distal       | Negative / N/S           | Brushings   | Negative                                                                    | Cholangiopathy                        | Clinicoradiographic Impression                                      | Alive, 20     |
| Validation | 186 | F | 83 | No  | 55     | Distal       | N/S / Negative (CS)      | Biopsy (CS) | Negative                                                                    | Gallbladder Adenocarcinoma            | Cholecystectomy with Partial Hepatectomy                            | Alive, 5      |
| Validation | 187 | F | 63 | No  | 458.4  | Distal       | Negative / N/S           | Brushings   | Negative                                                                    | Gallbladder Adenocarcinoma            | Cholecystectomy                                                     | Alive, 24     |
| Validation | 188 | M | 83 | No  | 1108   | Distal       | N/S / Positive (CG)      | Biopsy (CG) | Negative                                                                    | Distal Cholangiocarcinoma             | Concurrent ERCP Biopsy                                              | Alive, 14     |
| Validation | 189 | F | 63 | No  | N/S    | Distal       | N/S / Negative (CG)      | Biopsy (CG) | KRAS p.G12V, TP53 p.H139L                                                   | Pancreatic Ductal Adenocarcinoma      | Whipple Resection                                                   | Alive, 11     |
| Validation | 190 | M | 38 | Yes | 6      | Distal       | Negative / Negative (CG) | Both (CG)   | Both Specimens: Negative                                                    | Cholangiopathy                        | Clinicoradiographic Impression                                      | Alive, 23     |
| Validation | 191 | M | 84 | No  | 28.6   | Distal       | Negative / N/S           | Brushings   | Negative                                                                    | Cholangiopathy                        | Clinicoradiographic Impression                                      | Alive, 22     |
| Validation | 192 | M | 61 | No  | 97.6   | Distal       | Negative / N/S           | Brushings   | Negative                                                                    | Cholangiopathy                        | Clinicoradiographic Impression                                      | Decreased, 13 |
| Validation | 193 | M | 58 | No  | 33     | Distal       | Negative / N/S           | Brushings   | KRAS p.G12D, TP53 copy number loss                                          | Distal Cholangiocarcinoma             | Subsequent ERCP Biopsy                                              | Decreased, 14 |
| Validation | 194 | F | 48 | No  | 6.8    | Distal       | N/S / Negative (CG)      | Biopsy (CG) | Negative                                                                    | N/A                                   | N/A                                                                 | N/A           |
| Validation | 195 | M | 57 | No  | 274.9  | Distal       | Negative / Negative (CG) | Both (CG)   | Both Specimens: KRAS p.Q61H                                                 | N/A                                   | N/A                                                                 | N/A           |
| Validation | 196 | F | 67 | Yes | N/S    | Distal       | N/S / Negative (CG)      | Biopsy (CG) | Negative                                                                    | N/A                                   | N/A                                                                 | N/A           |
| Validation | 197 | M | 85 | No  | 28.3   | Distal       | Negative / Negative (CG) | Both (CG)   | Both Specimens: Negative                                                    | N/A                                   | N/A                                                                 | N/A           |
| Validation | 198 | F | 59 | No  | N/S    | Distal       | Negative / Negative (CS) | Biopsy (CS) | Negative                                                                    | Cholangiopathy                        | Clinicoradiographic Impression                                      | Alive, 25     |
| Validation | 199 | M | 85 | No  | N/S    | Distal       | Negative / Negative (CG) | Biopsy (CG) | TP53 p.R248Q, PIK3CA p.E545K                                                | Distal Cholangiocarcinoma             | Clinicoradiographic Impression                                      | Decreased, 12 |

|            |     |   |    |     |         |              |                          |             |                                                                  |                                       |                                                                                |               |
|------------|-----|---|----|-----|---------|--------------|--------------------------|-------------|------------------------------------------------------------------|---------------------------------------|--------------------------------------------------------------------------------|---------------|
| Validation | 200 | M | 49 | Yes | N/S     | Distal       | Negative / N/S           | Brushings   | Negative                                                         | N/A                                   | N/A                                                                            | N/A           |
| Validation | 201 | F | 76 | No  | 34      | Distal       | N/S / Positive (CG)      | Biopsy (CG) | ERBB2 p.D769Y, CDKN2A copy number loss, SMAD4 p.G352 Y353del     | Gallbladder Adenocarcinoma            | Concurrent ERCP Biopsy and Subsequent Cholecystectomy with Partial Hepatectomy | Decreased, 5  |
| Validation | 202 | M | 76 | No  | 20000   | Intrahepatic | Negative / N/S           | Brushings   | TP53 p.R248Q                                                     | Gallbladder Adenocarcinoma            | Biopsy of Hepatic Artery Lymph Node Metastasis                                 | Decreased, 8  |
| Validation | 203 | F | 71 | No  | 760.6   | Distal       | Negative / N/S           | Brushings   | Negative                                                         | Distal Cholangiocarcinoma             | Subsequent ERCP Biopsy                                                         | Alive, 12     |
| Validation | 204 | F | 44 | Yes | 5.5     | Distal       | Negative / N/S           | Brushings   | Negative                                                         | Cholangiopathy                        | Clinicoradiographic Impression                                                 | Alive, 12     |
| Validation | 205 | F | 72 | No  | 22      | Intrahepatic | Negative / Negative (CS) | Biopsy (CS) | Negative                                                         | Cholangiopathy                        | Liver Transplantation                                                          | Alive, 20     |
| Validation | 206 | M | 84 | No  | 456     | Hilar        | Negative / Positive (CG) | Both (CG)   | Both Specimens: Negative                                         | Perihilar Cholangiocarcinoma          | Concurrent ERCP Biopsy                                                         | Alive, 19     |
| Validation | 207 | M | 42 | Yes | 0.9     | Distal       | Negative / N/S           | Brushings   | Negative                                                         | Cholangiopathy                        | Liver Transplantation with Extended Bile Duct Resection                        | Alive, 17     |
| Validation | 208 | F | 70 | No  | 54.5    | Distal       | Negative / N/S           | Brushings   | KRAS p.G12D, TP53 p.R248Q, CDKN2A p.R80*, SMAD4 p.R361G          | Gallbladder Adenocarcinoma            | Cholecystectomy with HIPEC                                                     | Decreased, 13 |
| Validation | 209 | F | 61 | No  | 220.1   | Distal       | N/S / Negative (CG)      | Biopsy (CG) | Negative                                                         | Cholangiopathy                        | Clinicoradiographic Impression                                                 | Alive, 23     |
| Validation | 210 | M | 75 | No  | 102     | Hilar        | N/S / Negative (CG)      | Biopsy (CG) | Negative                                                         | Cholangiopathy                        | Clinicoradiographic Impression                                                 | Alive, 21     |
| Validation | 211 | M | 68 | No  | 20      | Distal       | N/S / Positive (CG)      | Biopsy (CG) | ERBB2 p.T793M, GNAS p.R201H, SMAD4 p.D351H                       | Distal Cholangiocarcinoma             | Concurrent ERCP Biopsy and Subsequent Whipple Resection                        | Decreased, 2  |
| Validation | 212 | M | 45 | No  | N/S     | Distal       | N/S / Negative (CG)      | Biopsy (CG) | Negative                                                         | N/A                                   | N/A                                                                            | N/A           |
| Validation | 213 | F | 56 | No  | N/S     | Distal       | N/S / Positive (CG)      | Biopsy (CG) | KRAS p.G12D, TP53 p.R342*                                        | Ampullary adenocarcinoma              | Concurrent ERCP Biopsy and Subsequent Whipple Resection                        | Decreased, 6  |
| Validation | 214 | F | 76 | No  | 247     | Distal       | N/S / Positive (CS)      | Biopsy (CS) | KRAS p.G12V, TP53 p.T253P, CDKN2A copy number loss               | Pancreatic Ductal Adenocarcinoma      | Concurrent ERCP Biopsy and Subsequent Whipple Resection                        | Alive, 9      |
| Validation | 215 | F | 77 | No  | 199.7   | Distal       | N/S / Negative (CG)      | Biopsy (CG) | Negative                                                         | Pancreatic Ductal Adenocarcinoma      | Pancreatic EUS-FNA                                                             | Decreased, 8  |
| Validation | 216 | F | 79 | No  | 430     | Hilar        | N/S / Positive (CG)      | Biopsy (CG) | TP53 p.Y163C, SMAD4 copy number loss                             | Perihilar Cholangiocarcinoma          | Concurrent ERCP Biopsy and Subsequent Abdominal Wall Metastasis Biopsy         | Decreased, 1  |
| Validation | 217 | M | 15 | Yes | 52.8    | Intrahepatic | Negative / N/S           | Brushings   | Negative                                                         | Cholangiopathy                        | Liver Transplantation                                                          | Alive, 17     |
| Validation | 218 | M | 40 | Yes | 11.3    | Intrahepatic | Negative / Negative (CS) | Both (CS)   | Both Specimens: Negative                                         | Intrahepatic Cholangiocarcinoma       | Subsequent ERCP Biopsy                                                         | Alive, 18     |
| Validation | 219 | F | 78 | No  | 78.3    | Hilar        | Negative / N/S           | Brushings   | Negative                                                         | Distal Cholangiocarcinoma             | Clinicoradiographic Impression                                                 | Decreased, 14 |
| Validation | 220 | M | 71 | No  | 160     | Distal       | Positive / Positive (CG) | Biopsy (CG) | ALK copy number gain, SMAD4 p.S144*                              | Distal Cholangiocarcinoma             | Concurrent ERCP Biopsy                                                         | Decreased, 3  |
| Validation | 221 | M | 55 | No  | 80.3    | Hilar        | Negative / Negative (CS) | Both (CS)   | Both Specimens: TP53 p.Q104*, CDKN2A p.R58*                      | Gallbladder Adenocarcinoma            | Biopsy of Peritoneal Metastasis                                                | Decreased, 7  |
| Validation | 222 | F | 82 | No  | 53      | Distal       | Negative / Negative (CS) | Both (CS)   | Biopsy: KRAS p.G12C, TP53 p.A276D; Brushings: Negative           | Pancreatic Ductal Adenocarcinoma      | Whipple Resection                                                              | Decreased, 10 |
| Validation | 223 | M | 63 | No  | 3638    | Distal       | Negative / N/S           | Brushings   | Negative                                                         | N/A                                   | N/A                                                                            | N/A           |
| Validation | 224 | F | 78 | No  | 7890    | Distal       | Negative / N/S           | Brushings   | Negative                                                         | Cholangiopathy                        | Clinicoradiographic Impression                                                 | Alive, 24     |
| Validation | 225 | F | 65 | No  | 31.3    | Distal       | N/S / Negative (CG)      | Biopsy (CG) | Negative                                                         | Cholangiopathy                        | Clinicoradiographic Impression                                                 | Alive, 13     |
| Validation | 226 | M | 67 | No  | N/S     | Hilar        | Negative / Negative (CG) | Both (CG)   | Both Specimens: Negative                                         | N/A                                   | N/A                                                                            | N/A           |
| Validation | 227 | M | 43 | No  | 71.4    | Intrahepatic | N/S / Negative (CS)      | Biopsy (CS) | Negative                                                         | Intrahepatic Cholangiocarcinoma       | Liver Core Needle Biopsy                                                       | Alive, 15     |
| Validation | 228 | F | 83 | No  | N/S     | Distal       | Negative / Negative (CG) | Biopsy (CG) | KRAS p.G12S, PIK3CA p.H1047R                                     | High-grade dysplasia of the bile duct | Whipple Resection                                                              | Alive, 26     |
| Validation | 229 | M | 58 | No  | 80.4    | Hilar        | Negative / N/S           | Brushings   | KRAS p.G12D, GNAS p.R201H, TP53 p.E336*, CDKN2A p.H83Y           | Perihilar Cholangiocarcinoma          | Liver EUS-FNA                                                                  | Alive, 21     |
| Validation | 230 | M | 68 | No  | 88.5    | Intrahepatic | Negative / N/S           | Brushings   | Negative                                                         | Intrahepatic Cholangiocarcinoma       | Clinicoradiographic Impression                                                 | Decreased, 12 |
| Validation | 231 | M | 62 | No  | N/S     | Intrahepatic | N/S / Positive (CS)      | Biopsy (CS) | IDH2 p.R140L, TP53 p.R333Lfs*12, CTNNB1 p.G34R                   | Mixed HCC-Cholangiocarcinoma          | Concurrent ERCP Biopsy                                                         | Alive, 7      |
| Validation | 232 | M | 55 | No  | 46.5    | Hilar        | Negative / Negative (CG) | Both (CG)   | Both Specimens: Negative                                         | N/A                                   | N/A                                                                            | N/A           |
| Validation | 233 | M | 73 | No  | 187.1   | Distal       | N/S / Positive (CG)      | Biopsy (CG) | TP53 p.P151T, CTNNB1 p.S45F, SMAD4 p.R361H                       | Intrahepatic Cholangiocarcinoma       | Concurrent ERCP Biopsy                                                         | Decreased, 5  |
| Validation | 234 | M | 58 | No  | 606     | Hilar        | Negative / Negative (CS) | Both (CS)   | Both Specimens: TP53 p.R248W                                     | Perihilar Cholangiocarcinoma          | Partial Hepatectomy                                                            | Alive, 5      |
| Validation | 235 | F | 75 | No  | 164.2   | Distal       | N/S / Positive (CG)      | Biopsy (CG) | IDH2 p.I170M, TP53 copy number loss                              | Ampullary adenocarcinoma              | Concurrent ERCP Biopsy and Subsequent Whipple Resection                        | Alive, 6      |
| Validation | 236 | F | 70 | No  | 452     | Hilar        | Negative / N/S           | Brushings   | TP53 p.I232S                                                     | Perihilar Cholangiocarcinoma          | Subsequent ERCP Biopsy                                                         | Alive, 23     |
| Validation | 237 | F | 70 | Yes | 137.2   | Distal       | Negative / Negative (CG) | Both (CG)   | Biopsy: KRAS p.G12V, PIK3CA p.C901F; Brushings: Negative         | Distal Cholangiocarcinoma             | Clinicoradiographic Impression                                                 | Decreased, 13 |
| Validation | 238 | M | 64 | No  | 52.4    | Distal       | Negative / Negative (CS) | Both (CS)   | Biopsy: KRAS p.G13D; Brushings: Negative                         | Distal Cholangiocarcinoma             | Whipple Resection                                                              | Alive, 14     |
| Validation | 239 | F | 79 | No  | 10392.4 | Distal       | Negative / N/S           | Brushings   | KRAS p.G12D                                                      | Pancreatic Ductal Adenocarcinoma      | Whipple Resection                                                              | Alive, 16     |
| Validation | 240 | M | 76 | No  | 4.5     | Distal       | N/S / Negative (CS)      | Biopsy (CS) | KRAS p.G12V                                                      | Distal Cholangiocarcinoma             | Biopsy of Omental Metastasis                                                   | Decreased, 5  |
| Validation | 241 | M | 80 | No  | 187.7   | Hilar        | N/S / Positive (CS)      | Biopsy (CS) | SMAD4 p.H528Yfs*8, SMAD4 copy number loss, AKT1 copy number loss | Perihilar Cholangiocarcinoma          | Concurrent ERCP Biopsy and Subsequent Partial Hepatectomy                      | Decreased, 2  |
| Validation | 242 | M | 69 | No  | 15      | Distal       | N/S / Negative (CG)      | Biopsy (CG) | KRAS p.Q61H                                                      | N/A                                   | N/A                                                                            | N/A           |
| Validation | 243 | F | 91 | No  | 64      | Hilar        | Negative / Negative (CS) | Biopsy (CS) | PIK3CA p.H1047R                                                  | Intrahepatic Cholangiocarcinoma       | Subsequent ERCP Biopsy                                                         | Decreased, 5  |
| Validation | 244 | M | 33 | No  | N/S     | Distal       | N/S / Positive (CG)      | Biopsy (CG) | KRAS p.G12D, TP53 p.R248Q                                        | Pancreatic Ductal Adenocarcinoma      | Concurrent ERCP Biopsy and Subsequent Omental Metastasis Biopsy                | Decreased, 14 |
| Validation | 245 | M | 65 | No  | 115.3   | Hilar        | N/S / Negative (CS)      | Biopsy (CS) | TP53 p.V173M                                                     | Perihilar Cholangiocarcinoma          | Partial Hepatectomy with Segmental Bile Duct Resection                         | Alive, 21     |
| Validation | 246 | F | 30 | Yes | 0.8     | Intrahepatic | Negative / Negative (CG) | Both (CG)   | Both Specimens: Negative                                         | Cholangiopathy                        | Clinicoradiographic Impression                                                 | Alive, 15     |
| Validation | 247 | M | 65 | No  | 118     | Distal       | Negative / N/S           | Brushings   | KRAS p.G12R                                                      | Pancreatic Ductal Adenocarcinoma      | Pancreatic EUS-FNA                                                             | Alive, 5      |
| Validation | 248 | M | 59 | No  | 136.5   | Distal       | Negative / Negative (CG) | Both (CG)   | Both Specimens: Negative                                         | N/A                                   | N/A                                                                            | N/A           |
| Validation | 249 | F | 70 | No  | N/S     | Distal       | Positive / Positive (CG) | Biopsy (CG) | BRAF p.V600E, BRAF p.S605N, TP53 p.R213*, SMAD4 p.S178*          | Metastatic colonic adenocarcinoma     | Concurrent ERCP Biopsy and Subsequent Liver Core Needle Biopsy                 | Decreased, 1  |
| Validation | 250 | M | 76 | Yes | 25.2    | Hilar        | Negative / N/S           | Brushings   | KRAS p.G12D                                                      | Intrahepatic Cholangiocarcinoma       | Liver Core Needle Biopsy                                                       | Decreased, 9  |
| Validation | 251 | M | 71 | Yes | 8.7     | Intrahepatic | Negative / N/S           | Brushings   | Negative                                                         | Cholangiopathy                        | Clinicoradiographic Impression                                                 | Alive, 21     |
| Validation | 252 | M | 69 | Yes | 266.4   | Hilar        | N/S / Negative (CS)      | Biopsy (CS) | Negative                                                         | Cholangiopathy                        | Clinicoradiographic Impression                                                 | Alive, 26     |

Abbreviations: CG, cholangiographic-guided biopsy; CS, cholangioscopic-guided biopsy; N/A, not available; N/S, not submitted; PSC, primary sclerosing cholangitis

\*\*Malignant biliary duct pathology of brushings/biopsies was defined as at least high-grade dysplasia or at least suspicious for malignancy.
