# Supplementary material
Source: HighWire-hosted journal article supplement (https://gut.bmj.com/content/69/1/52)
Supplement: inline-supplementary-material-3 [file inline-supplementary-material-3.pdf]

**Supplementary Table 2. Subanalysis of paired cholangioscopic-guided versus cholangiographic-guided biliary biopsies.**

| Parameter                                                        | Sensitivity (95% CI) | Specificity (95% CI) | PPV (95% CI)       | NPV (95% CI)      | AUC (95% CI)       |
|------------------------------------------------------------------|----------------------|----------------------|--------------------|-------------------|--------------------|
| Paired cholangioscopic-guided biliary biopsies ( <i>n</i> = 28)  |                      |                      |                    |                   |                    |
| Pathologic evaluation                                            | 50% (0.30 - 0.70)    | 100% (0.40 - 1.00)   | 100% (0.70 - 1.00) | 25% (0.08 - 0.53) | 0.75 (0.55 - 0.95) |
| BiliSeq testing                                                  | 71% (0.49 - 0.87)    | 100% (0.40 - 1.00)   | 100% (0.77 - 1.00) | 36% (0.12 - 0.68) | 0.85 (0.71 - 1.00) |
| Pathologic evaluation and BiliSeq testing                        | 79% (0.57 - 0.92)    | 100% (0.40 - 1.00)   | 100% (0.79 - 1.00) | 44% (0.15 - 0.77) | 0.90 (0.78 - 1.00) |
| Paired cholangiographic-guided biliary biopsies ( <i>n</i> = 86) |                      |                      |                    |                   |                    |
| Pathologic evaluation                                            | 53% (0.40 - 0.66)    | 100% (0.82 - 1.00)   | 100% (0.87 - 1.00) | 42% (0.29 - 0.57) | 0.77 (0.67 - 0.86) |
| BiliSeq testing                                                  | 78% (0.66 - 0.87)    | 100% (0.82 - 1.00)   | 100% (0.91 - 1.00) | 61% (0.44 - 0.76) | 0.89 (0.82 - 0.96) |
| Pathologic evaluation and BiliSeq testing                        | 86% (0.75 - 0.93)    | 100% (0.82 - 1.00)   | 100% (0.92 - 1.00) | 71% (0.52 - 0.85) | 0.93 (0.88 - 0.98) |

Abbreviations: AUC, area under the curve; NPV, negative predictive value; PPV, positive predictive value
