# Supplementary material
Source: HighWire-hosted journal article supplement (https://gut.bmj.com/content/69/1/52)
Supplement: inline-supplementary-material-4 [file inline-supplementary-material-4.pdf]

Supplementary Table 3. Detailed clinical, laboratory, pathologic, molecular and follow-up characteristics of 26 patients with repeat ERCP and BiliSeq testing (successive testing is listed in chronologic order).

| Set        | Patient | Gender | Age (years) | History of PSC | Serum CA19-9 (Units/mL) | Location of Stricture | Malignant Bile Duct Pathology Brushing/Biopsy* | Specimen for BiliSeq Testing | Molecular Alterations                                    | Follow-up Diagnosis                   | Method of Follow-up Diagnosis  |
|------------|---------|--------|-------------|----------------|-------------------------|-----------------------|------------------------------------------------|------------------------------|----------------------------------------------------------|---------------------------------------|--------------------------------|
| Training   | 6       | F      | 96          | No             | N/S                     | Distal                | N/S / Negative (CG)                            | Biopsy (CG)                  | Negative                                                 | Distal Cholangiocarcinoma             | Autopsy                        |
|            | 6       | F      | 96          | No             | N/S                     | Distal                | N/S / Positive (CG)                            | Biopsy (CG)                  | KRAS p.Q61L                                              | Distal Cholangiocarcinoma             | Autopsy                        |
| Training   | 14      | M      | 65          | No             | 120.7                   | Distal                | N/S / Negative (CG)                            | Brushings                    | KRAS p.G12A                                              | Distal Cholangiocarcinoma             | Clinicoradiographic Impression |
|            | 14      | M      | 66          | No             | 194.2                   | Distal                | N/S / Negative (CG)                            | Biopsy (CG)                  | KRAS p.G12A                                              | Distal Cholangiocarcinoma             | Clinicoradiographic Impression |
|            | 14      | M      | 67          | No             | 208.2                   | Distal                | N/S / Negative (CG)                            | Biopsy (CG)                  | KRAS p.G12A                                              | Distal Cholangiocarcinoma             | Clinicoradiographic Impression |
|            | 14      | M      | 67          | No             | 202.3                   | Distal                | N/S / Negative (CG)                            | Biopsy (CG)                  | KRAS p.G12A                                              | Distal Cholangiocarcinoma             | Clinicoradiographic Impression |
|            | 34      | M      | 72          | Yes            | 39                      | Intrahepatic          | Negative / N/S                                 | Brushings                    | GNAS p.R201C                                             | Intrahepatic Cholangiocarcinoma       | Clinicoradiographic Impression |
| Training   | 34      | M      | 73          | Yes            | 41                      | Intrahepatic          | Negative / Negative (CG)                       | Brushings                    | GNAS p.R201C                                             | Intrahepatic Cholangiocarcinoma       | Clinicoradiographic Impression |
|            | 36      | M      | 26          | Yes            | 316.4                   | Distal                | Negative / N/S                                 | Brushings                    | Negative                                                 | Cholangiopathy                        | Clinicoradiographic Impression |
|            | 36      | M      | 29          | Yes            | N/S                     | Distal                | N/S / Negative (CG)                            | Biopsy (CG)                  | Negative                                                 | Cholangiopathy                        | Clinicoradiographic Impression |
|            | 53      | F      | 26          | Yes            | 30                      | Distal                | N/S / Negative (CG)                            | Brushings                    | Negative                                                 | Cholangiopathy                        | Clinicoradiographic Impression |
| Training   | 53      | F      | 27          | Yes            | 31                      | Distal                | Negative / N/S                                 | Brushings                    | Negative                                                 | Cholangiopathy                        | Clinicoradiographic Impression |
|            | 68      | M      | 52          | No             | N/S                     | Distal                | Negative / Negative (CG)                       | Both (CG)                    | Both Specimens: Negative                                 | N/A                                   |                                |
| Validation | 68      | M      | 52          | No             | 87.8                    | Distal                | Negative / Negative (CG)                       | Both (CG)                    | Biopsy: ERBB2 p.V842I; Brushings: Negative               | N/A                                   |                                |
|            | 69      | M      | 89          | No             | 297                     | Distal                | N/S / Negative (CG)                            | Biopsy (CG)                  | Negative                                                 | Distal Cholangiocarcinoma             | Subsequent ERCP Biopsy         |
| Validation | 69      | M      | 89          | No             | 321                     | Distal                | Positive / Positive (CG)                       | Both (CG)                    | Both Specimens: Negative                                 | Distal Cholangiocarcinoma             | Concurrent ERCP Biopsy         |
|            | 79      | F      | 79          | No             | 164                     | Hilar                 | N/S / Negative (CG)                            | Biopsy (CG)                  | Negative                                                 | Perihilar Cholangiocarcinoma          | Subsequent ERCP Biopsy         |
| Validation | 79      | F      | 79          | No             | 130                     | Hilar                 | Negative / Negative (CG)                       | Both (CG)                    | Both Specimens: Negative                                 | Perihilar Cholangiocarcinoma          | Subsequent ERCP Biopsy         |
|            | 83      | M      | 73          | No             | 480                     | Hilar                 | Negative / Negative (CS)                       | Brushings                    | Negative                                                 | Perihilar Cholangiocarcinoma          | Intraoperative Liver Biopsy    |
|            | 83      | M      | 74          | No             | 1888                    | Hilar                 | N/S / Negative (CG)                            | Biopsy (CG)                  | Negative                                                 | Perihilar Cholangiocarcinoma          | Intraoperative Liver Biopsy    |
|            | 83      | M      | 74          | No             | 2003                    | Hilar                 | N/S / Negative (CG)                            | Biopsy (CG)                  | KRAS p.Q61H, TP53 p.Y236C                                | Perihilar Cholangiocarcinoma          | Intraoperative Liver Biopsy    |
|            | 96      | M      | 81          | No             | 760.8                   | Hilar                 | Negative / N/S                                 | Brushings                    | Negative                                                 | Cholangiopathy                        | Clinicoradiographic Impression |
| Validation | 96      | M      | 81          | No             | 760.8                   | Hilar                 | Negative / N/S                                 | Brushings                    | Negative                                                 | Cholangiopathy                        | Clinicoradiographic Impression |
|            | 96      | M      | 81          | No             | 760                     | Hilar                 | Negative / N/S                                 | Brushings                    | Negative                                                 | Cholangiopathy                        | Clinicoradiographic Impression |
|            | 121     | F      | 73          | No             | 41                      | Intrahepatic          | Negative / N/S                                 | Brushings                    | GNAS p.R201H                                             | N/A                                   |                                |
|            | 121     | F      | 73          | No             | 41                      | Intrahepatic          | N/S / Negative (CG)                            | Biopsy (CG)                  | GNAS p.R201H                                             | N/A                                   |                                |
| Validation | 139     | M      | 73          | No             | 1202                    | Distal                | N/S / Negative (CG)                            | Biopsy (CG)                  | Negative                                                 | Distal Cholangiocarcinoma             | Clinicoradiographic Impression |
|            | 139     | M      | 73          | No             | 2239                    | Distal                | Negative / Negative (CG)                       | Both (CG)                    | Biopsy: TP53 p.P278S; Brushings: Negative                | Distal Cholangiocarcinoma             | Clinicoradiographic Impression |
| Validation | 142     | M      | 81          | No             | 25                      | Distal                | Negative / N/S                                 | Brushings                    | Negative                                                 | Pancreatic Ductal Adenocarcinoma      | Pancreatic EUS-FNA             |
|            | 142     | M      | 81          | No             | 16                      | Distal                | Positive / Positive (CG)                       | Both (CG)                    | Both Specimens: Negative                                 | Pancreatic Ductal Adenocarcinoma      | Pancreatic EUS-FNA             |
| Validation | 151     | F      | 72          | No             | 4.2                     | Distal                | Negative / Negative (CG)                       | Both (CG)                    | Both Specimens: Negative                                 | N/A                                   |                                |
|            | 151     | F      | 72          | No             | 4.2                     | Distal                | Negative / Negative (CG)                       | Both (CG)                    | Both Specimens: Negative                                 | N/A                                   |                                |
|            | 151     | F      | 72          | No             | 4                       | Distal                | Negative / Negative (CG)                       | Both (CG)                    | Both Specimens: Negative                                 | N/A                                   |                                |
| Validation | 153     | F      | 55          | No             | 90.4                    | Hilar                 | Negative / Negative (CS)                       | Both (CS)                    | Both Specimens: Negative                                 | N/A                                   |                                |
|            | 153     | F      | 55          | No             | 89.2                    | Hilar                 | Negative / Negative (CS)                       | Both (CS)                    | Both Specimens: Negative                                 | N/A                                   |                                |
|            | 153     | F      | 55          | No             | 93.5                    | Hilar                 | Negative / Negative (CG)                       | Both (CG)                    | Both Specimens: Negative                                 | N/A                                   |                                |
| Validation | 153     | F      | 55          | No             | 88.4                    | Hilar                 | Negative / Negative (CG)                       | Both (CG)                    | Both Specimens: Negative                                 | N/A                                   |                                |
|            | 154     | M      | 66          | No             | N/S                     | Distal                | N/S / Negative (CG)                            | Biopsy (CG)                  | KRAS p.G12R                                              | Ampullary adenocarcinoma              | Whipple Resection              |
|            | 154     | M      | 66          | No             | N/S                     | Distal                | N/S / Positive (CG)                            | Biopsy (CG)                  | KRAS p.G12R, CDKN2A copy number loss                     | Ampullary adenocarcinoma              | Whipple Resection              |
| Validation | 155     | M      | 66          | No             | 53                      | Distal                | Negative / Negative (CG)                       | Both (CG)                    | Both Specimens: Negative                                 | Cholangiopathy                        | Clinicoradiographic Impression |
|            | 155     | M      | 66          | No             | N/S                     | Distal                | N/S / Negative (CG)                            | Biopsy (CG)                  | Negative                                                 | Cholangiopathy                        | Clinicoradiographic Impression |
| Validation | 157     | F      | 73          | No             | 55                      | Intrahepatic          | Negative / N/S                                 | Brushings                    | ERBB2 amplification, TP53 p.C242fs*5                     | Intrahepatic Cholangiocarcinoma       | Subsequent ERCP Biopsy         |
|            | 157     | F      | 73          | No             | 422.4                   | Intrahepatic          | Positive / Positive (CG)                       | Brushings                    | ERBB2 amplification, TP53 p.C242fs*5                     | Intrahepatic Cholangiocarcinoma       | Concurrent ERCP Biopsy         |
| Validation | 174     | M      | 83          | No             | 6                       | Distal                | Negative / Negative (CS)                       | Both (CS)                    | Both Specimens: Negative                                 | N/A                                   |                                |
|            | 174     | M      | 84          | No             | 9.1                     | Distal                | Negative / Negative (CG)                       | Both (CG)                    | Both Specimens: Negative                                 | N/A                                   |                                |
| Validation | 175     | M      | 57          | No             | 43                      | Distal                | Negative / Negative (CS)                       | Both (CS)                    | Both Specimens: Negative                                 | Cholangiopathy                        | Clinicoradiographic Impression |
|            | 175     | M      | 57          | No             | 39.3                    | Distal                | N/S / Negative (CS)                            | Biopsy (CS)                  | Negative                                                 | Cholangiopathy                        | Clinicoradiographic Impression |
| Validation | 176     | F      | 77          | No             | 195.8                   | Hilar                 | Negative / Negative (CG)                       | Biopsy (CG)                  | FGFR2 p.S252W                                            | Intrahepatic Cholangiocarcinoma       | Clinicoradiographic Impression |
|            | 176     | F      | 78          | No             | 410.3                   | Hilar                 | Negative / Negative (CG)                       | Both (CG)                    | Both Specimens: FGFR2 p.S252W                            | Intrahepatic Cholangiocarcinoma       | Clinicoradiographic Impression |
| Validation | 177     | M      | 68          | Yes            | 6                       | Intrahepatic          | Negative / Negative (CS)                       | Brushings                    | TP53 p.F338Lfs*6, CDKN2A p.R80*                          | High-grade dysplasia of the bile duct | Partial Hepatectomy            |
|            | 177     | M      | 68          | Yes            | 5                       | Intrahepatic          | Negative / Negative (CG)                       | Brushings                    | TP53 p.F338Lfs*6, CDKN2A p.R80*                          | High-grade dysplasia of the bile duct | Partial Hepatectomy            |
| Validation | 197     | M      | 85          | No             | 28.3                    | Distal                | Negative / Negative (CG)                       | Both (CG)                    | Both Specimens: Negative                                 | N/A                                   |                                |
|            | 197     | M      | 85          | No             | 34.5                    | Distal                | Negative / Negative (CG)                       | Brushings                    | Negative                                                 | N/A                                   |                                |
| Validation | 218     | M      | 40          | Yes            | 11.3                    | Intrahepatic          | Negative / Negative (CS)                       | Both (CS)                    | Both Specimens: Negative                                 | Intrahepatic Cholangiocarcinoma       | Subsequent ERCP Biopsy         |
|            | 218     | M      | 40          | Yes            | 11.3                    | Intrahepatic          | Negative / Positive (CS)                       | Both (CS)                    | Biopsy: MET copy number gain; Brushings: Negative        | Intrahepatic Cholangiocarcinoma       | Concurrent ERCP Biopsy         |
| Validation | 237     | F      | 70          | Yes            | 137.2                   | Distal                | Negative / Negative (CG)                       | Both (CG)                    | Biopsy: KRAS p.G12V, PIK3CA p.C901F; Brushings: Negative | Distal Cholangiocarcinoma             | Clinicoradiographic Impression |
|            | 237     | F      | 70          | Yes            | 137.2                   | Distal                | Negative / N/S                                 | Brushings                    | KRAS p.G12V, PIK3CA p.C901F                              | Distal Cholangiocarcinoma             | Clinicoradiographic Impression |
|            | 237     | F      | 70          | Yes            | 120                     | Distal                | Negative / Negative (CG)                       | Both (CG)                    | Both Specimens: PIK3CA p.C901F                           | Distal Cholangiocarcinoma             | Clinicoradiographic Impression |
|            | 237     | F      | 70          | Yes            | 88.8                    | Distal                | Positive / Negative (CG)                       | Both (CG)                    | Brushings: PIK3CA p.C901F; Biopsy: Negative              | Distal Cholangiocarcinoma             | Clinicoradiographic Impression |
| Validation | 243     | F      | 91          | No             | 64                      | Hilar                 | Negative / Negative (CS)                       | Brushings                    | PIK3CA p.H1047R                                          | Intrahepatic Cholangiocarcinoma       | Subsequent ERCP Biopsy         |
|            | 243     | F      | 91          | No             | 64                      | Hilar                 | Positive / Positive (CS)                       | Both (CS)                    | Both Specimens: PIK3CA p.H1047R                          | Intrahepatic Cholangiocarcinoma       | Concurrent ERCP Biopsy         |

Abbreviations: CG, cholangiographic-guided biopsy; CS, cholangioscopic-guided biopsy; N/A, not available; N/S, not submitted; PSC, primary sclerosing cholangitis

\*Malignant biliary duct pathology of brushings/biopsies was defined as at least high-grade dysplasia or at least suspicious for malignancy.
