# Supplementary material
Source: HighWire-hosted journal article supplement (https://gut.bmj.com/content/69/1/52)

**A**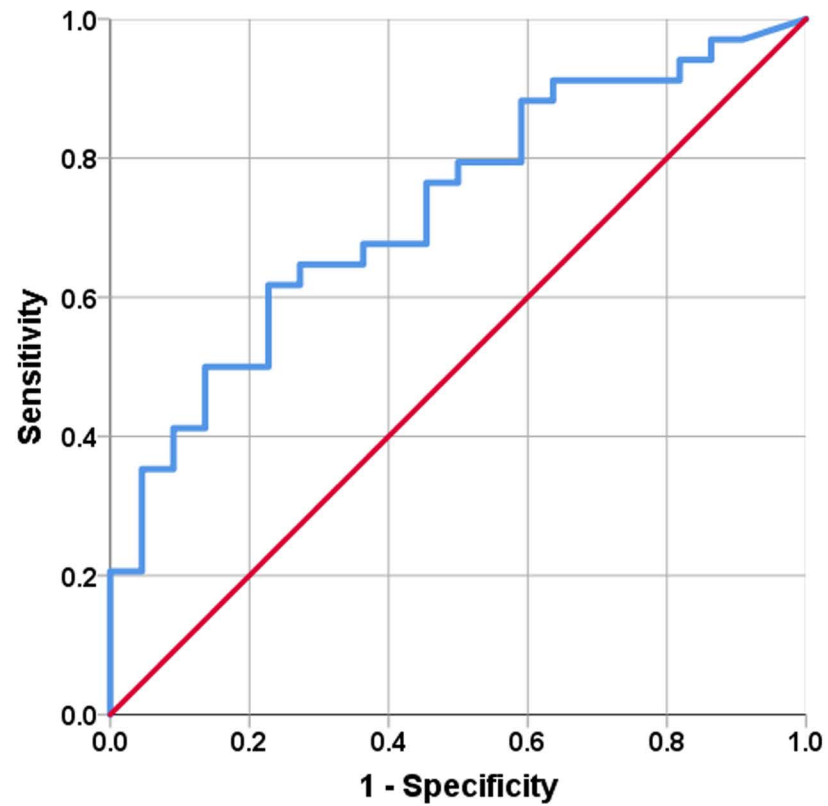**B**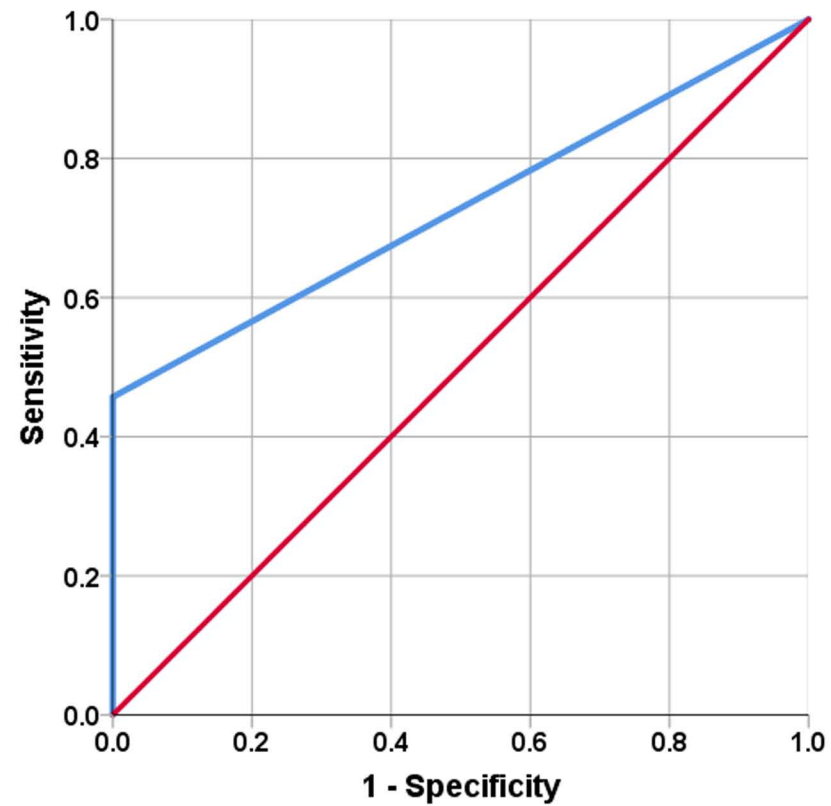**C**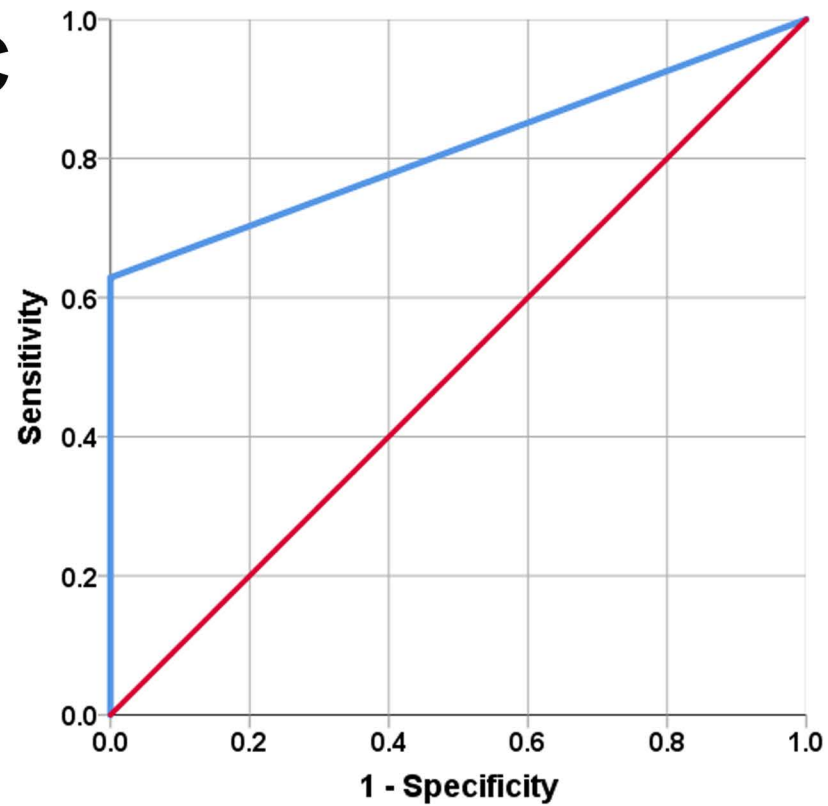

Supplement: inline-supplementary-material-2 [file inline-supplementary-material-2.pdf]

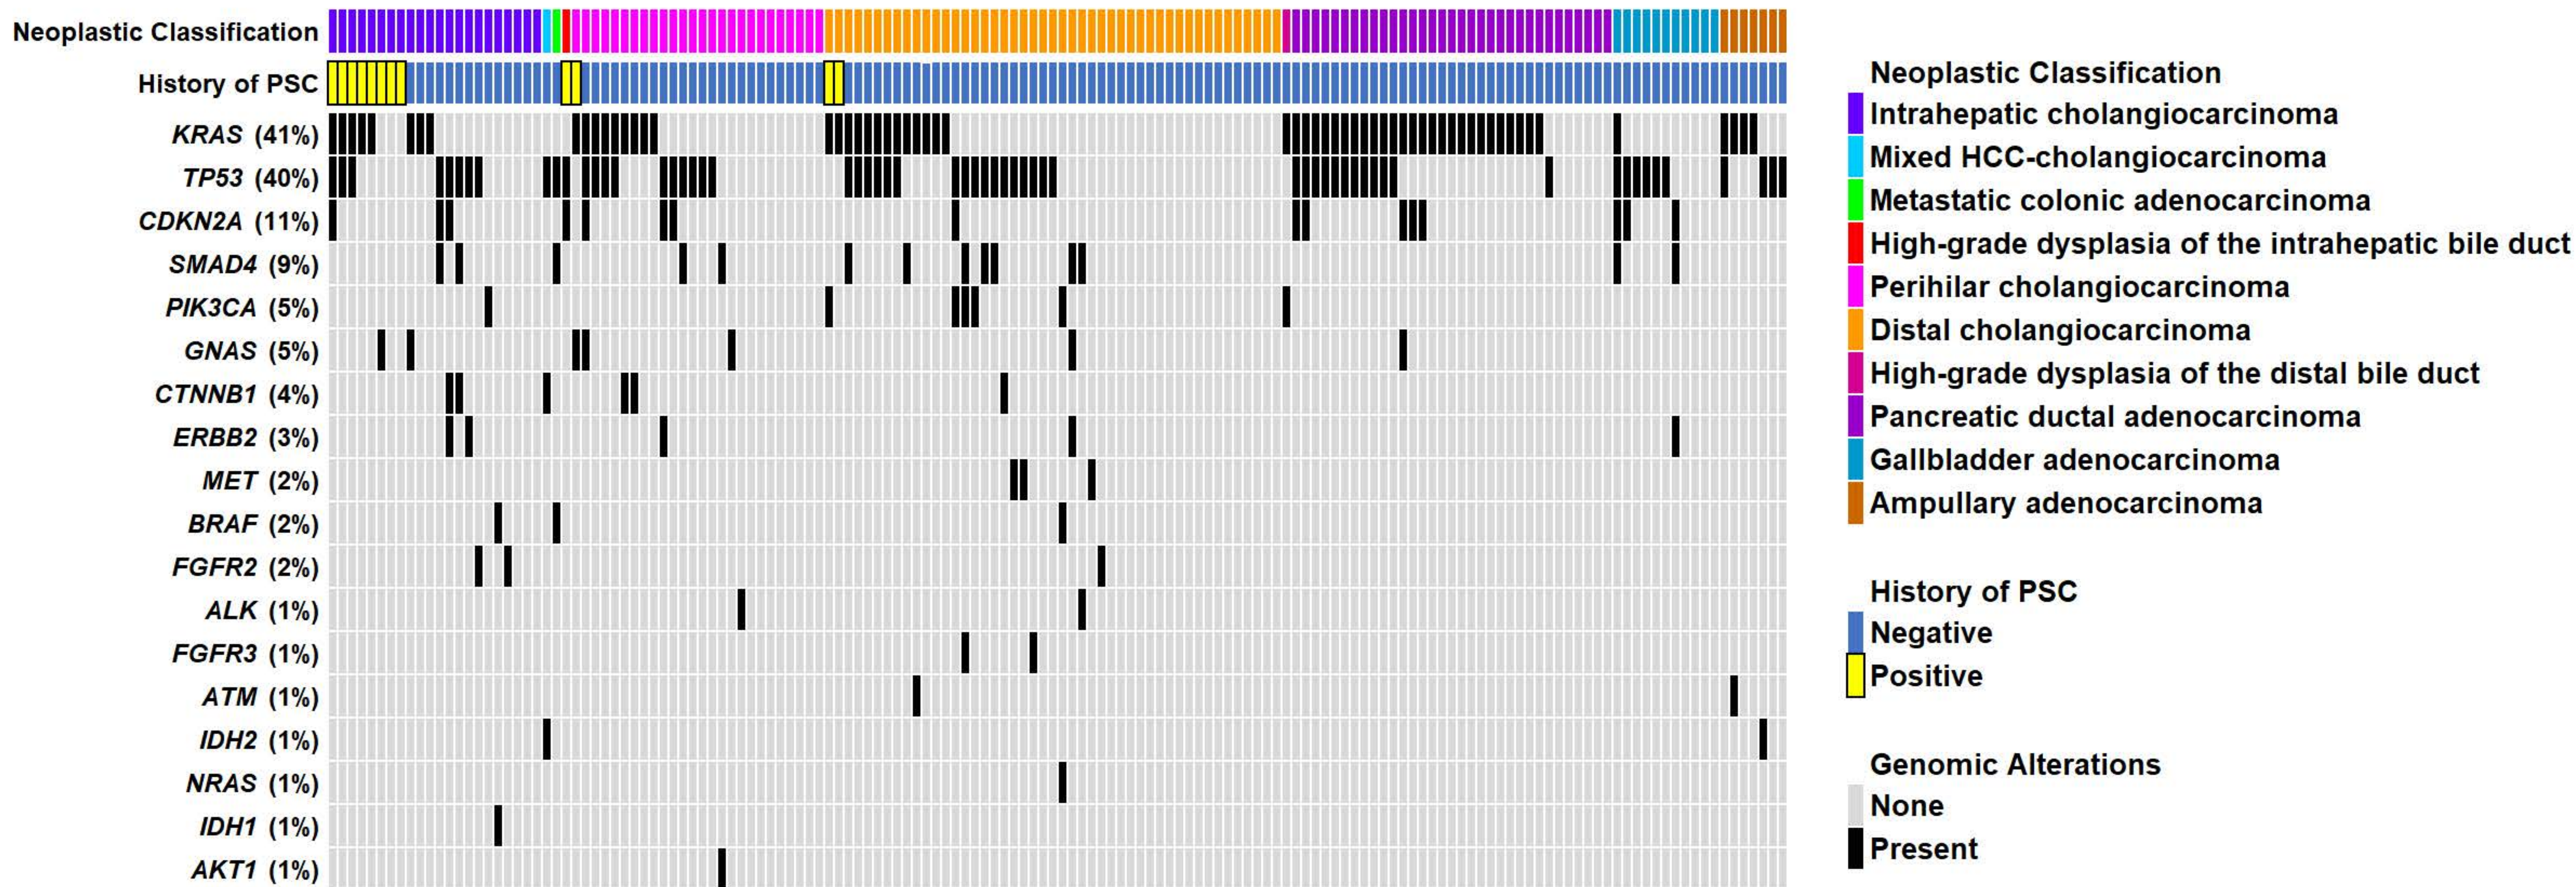

Supplement: inline-supplementary-material-6 [file inline-supplementary-material-6.pdf]

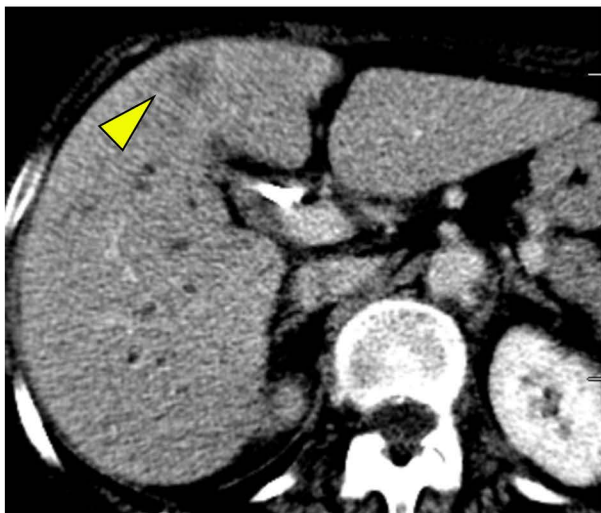

**Treatment Start**

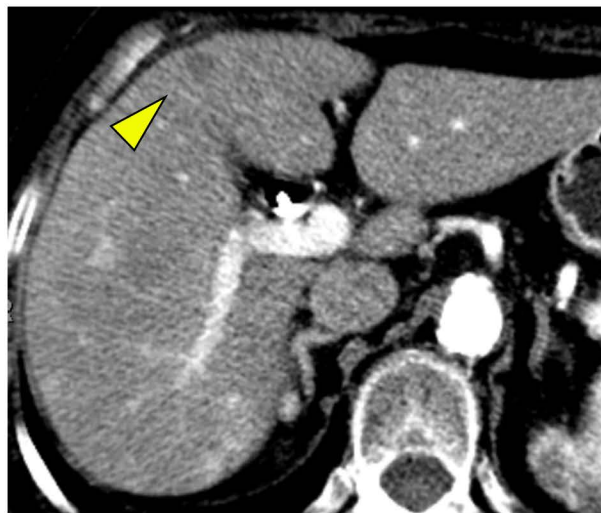

**3 Months**

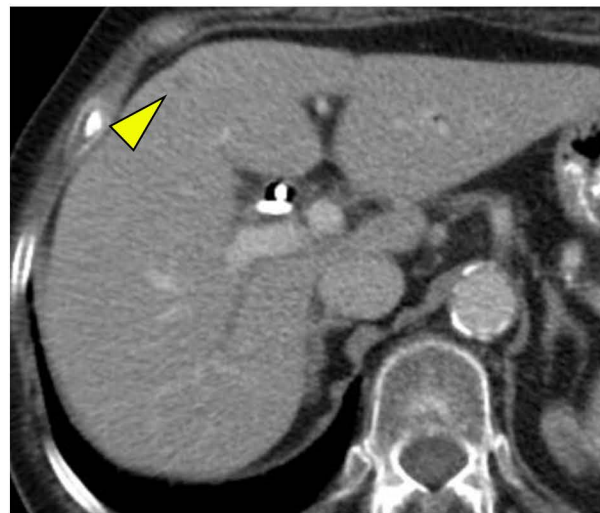

**6 Months**

Supplement: inline-supplementary-material-7 [file inline-supplementary-material-7.pdf]
